# Supplementary material for: Qualitative analysis of 6961 free-text comments from the first National Cancer Patient Experience Survey in Scotland
Source: PubMed Central journal article supplement — BMJ Open. 2017 Jun 15;7(6):e015726. doi: 10.1136/bmjopen-2016-015726 (PMC5734250; doi:10.1136/bmjopen-2016-015726), 2017-06-15
Supplement: bmjopen-2016-015726.draft_revisions.pdf [file bmjopen-2016-015726.draft_revisions.pdf]

# BMJ Open

## Patients' experiences of cancer care: Analysis of 6961 free-text comments from a National survey

|                                 |                                                                                                                               |
|---------------------------------|-------------------------------------------------------------------------------------------------------------------------------|
| Journal:                        | <i>BMJ Open</i>                                                                                                               |
| Manuscript ID                   | bmjopen-2016-015726                                                                                                           |
| Article Type:                   | Research                                                                                                                      |
| Date Submitted by the Author:   | 23-Dec-2016                                                                                                                   |
| Complete List of Authors:       | Cunningham, Margaret; University of Stirling, NMAHP Research Unit<br>Wells, Mary; University of Stirling, NMAHP Research Unit |
| <b>Primary Subject Heading</b>: | Patient-centred medicine                                                                                                      |
| Secondary Subject Heading:      | Oncology, Qualitative research                                                                                                |
| Keywords:                       | patient experience, free text, national survey, Scotland, cancer                                                              |
|                                 |                                                                                                                               |

SCHOLARONE™  
Manuscripts

Peer Review Only

1  
2  
3  
4 Patients' experiences of cancer care: Analysis of 6961 free-text  
5 comments from a National survey  
6  
7

8  
9 Dr Maggie Cunningham<sup>1</sup>, Prof Mary Wells<sup>1</sup>  
10

11 <sup>1</sup> NMAHP Research Unit, University of Stirling, Stirling, UK.  
12  
13

14 Word count = 5,052  
15  
16

17  
18 Corresponding author:  
19

20 Prof Mary Wells, NMAHP Research Unit, University of Stirling, Stirling, FK9 4LA  
21

22 Email: [mary.wells@stir.ac.uk](mailto:mary.wells@stir.ac.uk)  
23

24 Phone: 01786 466118  
25  
26  
27  
28  
29  
30  
31  
32  
33  
34  
35  
36  
37  
38  
39  
40  
41  
42  
43  
44  
45  
46  
47  
48  
49  
50  
51  
52  
53  
54  
55  
56  
57  
58  
59  
60

## Abstract

### Objectives

To analyse free-text responses from the first Scottish Cancer Patient Experience Survey to understand patients' experiences of care, identify valued aspects and areas for improvement.

### Design

Inductive thematic analysis of seven free-text comment boxes covering all stages of the cancer experience, from a national cohort survey.

### Setting and participants

Adult cancer patients diagnosed in Scotland between July 2013 and March 2014, and who had an inpatient stay or hospital visit between January and September 2014. 2663 respondents (of n=4835 survey respondents) provided 6961 free-text comments.

### Main outcome measures

Positive and negative themes of patients' experiences. Differences in the proportion of positive to negative comments by demographics.

### Methods

Data were analysed as follows: (i) comments were initially categorised at a high level (eg positive, negative, miscellaneous etc); (ii) inductive codes were derived from the data and applied to all relevant comments; (iii) codes which shared similar meaning were amalgamated into sub-themes, and code frequencies were measured; (iv) subthemes were mapped into overarching themes; (v) difference in the proportion of positive to negative comments by demographic were analysed using chi-squared tests.

### Results

Participants made more positive than negative comments (1:0.78). Analysis highlighted the importance to patients of *Feeling that Individual Needs Are Met* and *Feeling Confident Within the System*. Comments also provided insight into how *Processes* and *Structures* within the system of care can negatively impact on patients' experience. Particular issues were identified with patients' experience of care in the lead up to diagnosis.

### Conclusions

This analysis provides a detailed understanding of what matters to patients about their cancer care experience. Although the majority of comments were positive, there were a significant number of negative comments, especially about the lead up to diagnosis. Comments suggest patients would value greater integration of care from services involved in their treatment for cancer.

Abstract word count = 299

### Strengths and limitations of this study

- Large dataset from a National survey
- Use of seven free-text comment boxes gives patients a chance to comment on all aspects of the cancer patient experience.
- Analysis by each comment box gave clear indication of stages of care which are of specific concern.
- Analysis across the whole dataset identified themes about their cancer care which are of particular importance to patients.

- Free-text responses to surveys may not be representative of all patients' experiences.

## Funding

This work was funded by the Scottish Government and Macmillan Cancer Support.

## Competing interests

None declared.

## Authors' contributions

Both authors have made substantial contributions to this work, participated in writing and revising the paper, and approved the final submission. Both authors have agreed to be accountable for all aspects of the work. MC led on analysis of the data, developing the coding framework and writing the paper. MW contributed to the development of the coding framework and the writing process, and led on identification of the themes.

## Data sharing statement

The data for the study are the free-text responses to the 2015-16 Scottish Cancer Patient Experience Survey. The data is available from the Scottish Government Information Services Division. The data was provided by the Scottish Government Analytical Services Division, following agreement from the Public Benefits and Privacy Panel.

## Acknowledgements

The authors wish to thank the patients who took the time to leave free-text comments in the survey. We would also like to acknowledge the work of the Scottish Cancer Patient Experience Survey Steering Group in guiding the design of the survey tool. We would like to thank Andrew Paterson and Emma Milburn, Scottish Government and Kelly Shiell-Davis and Hanna Hine, Macmillan Cancer Support, for their help and support critically commenting on the survey report; and Patricia Aitchison, Research Fellow, NMAHP RU, University of Stirling, for her work in double coding.

## Introduction

Finding ways to deliver high quality, person-centred care is central to NHS policy, and has been driven by rising demands, financial pressures, concerns about standards of care and a greater focus on the 'consumer's' perspective.[1] Patient experience is recognised as one of the critical elements of high quality health care, along with clinical effectiveness and safety.[2] Not just important in itself, patient experience has been shown to be positively associated with a range of health, resource use and safety outcomes.[3] In NHS England, a measure of patient experience is included as one of four key metrics contributing to each health board's overall rating for cancer care.[4] Assessing the patient's perspective provides valuable insights into how the whole healthcare system impacts upon the patient's experience across the care continuum, rather than looking at individual services in isolation from a clinical or hospital management standpoint.[5]

Cancer remains a leading cause of death worldwide and will affect one in two people in the UK during their lifetime.[6] For many patients, being diagnosed and treated for cancer is a long and complicated process, involving multiple stages of investigation and treatment, and multiple encounters with a variety of health professionals and services. Several surveys have been conducted by researchers to gain a better understanding of cancer patients' experience of care, although the majority of these look at particular aspects of the care trajectory e.g. follow-up care,[7] hospital care;[8] or at specific types of cancer e.g. breast,[9] lung and colorectal.[10]

National Cancer Patient Experience Surveys have been carried out annually in England since 2010,[11] and also in Norway,[12] Northern Ireland,[13] and Wales.[14] This is the first time such a survey has been conducted in Scotland. The quantitative results of the SCPES were published earlier this year, highlighting that the majority of patients have a positive experience of care overall, and that many aspects of care provision are working well.[15] However, the results also draw attention to particular areas of care which are less positive and require service improvement.[15]

Previous research has found that quantitative data have limited use in designing service improvements as they do not provide a sufficiently detailed description of the issues which matter to patients.[16] Including free-text comments in experience surveys has the potential to overcome this problem, giving the patient a voice to influence service improvement.[17] Previous UK National surveys have included three brief opportunities for free-text, asking 'was there anything particularly good about your NHS cancer care?', 'was there anything that could have been improved?', and 'any other comments?' at the end of the survey.[18] The SCPES steering group made a decision to include a free-text question at the end of each section of the survey, providing an opportunity for patients to write about different aspects of their cancer care in more detail.

The present paper reports on the thematic analysis of all free-text comments provided by participants in the 2015-16 SCPES. The purpose of the analysis was to understand the full breadth of cancer patients' experiences of care in their own words, and from this to identify the aspects of the cancer care experience which participants particularly valued, and also to explore themes which highlight areas for improvement in cancer services.

## Methods

### Study design

Data gathering for the Scottish Cancer Patient Experience Survey (SCPES) took place between 7<sup>th</sup> October 2015 and 22<sup>nd</sup> January 2016. Jointly funded by the Scottish Government and Macmillan Cancer Support, the survey was posted to all NHS Scotland patients who met the following inclusion criteria: -

- Diagnosed with any cancer between July 2013 and March 2014
- Had an inpatient stay or hospital visit as a day case between 1<sup>st</sup> January and 30<sup>th</sup> September 2014

In total, 7,949 survey packs were sent. Two reminder letters were sent to non-responders after 3 and 6 weeks. Patients could respond to the survey via freepost return, or by completing the survey online.

### Survey

The survey questionnaire was based on the equivalent English National Cancer Patient Experience Survey,[18] with 69 questions covering referral to hospital by GP, diagnosis, decisions about treatment, role of the clinical nurse specialist, support for people with cancer, hospital doctors and ward nurses, hospital care and treatment, radiotherapy and chemotherapy, home care and support, care from general practice and overall NHS care. In addition, seven free-text comment boxes were included throughout the questionnaire asking participants if there was anything else they would like to add about their experiences in relation to seven areas of care (Table 1). Demographic and clinical information were collected including gender, age, socio-economic status, employment status and tumour group. Anonymised data were transferred from Scottish Government to the researchers, using encrypted software.

### Governance

The approvals process for the survey was led by the Information and Statistics Division (ISD). Approval was given by the Public Benefits and Privacy Panel [www.informationgovernance.scot.nhs.uk/](http://www.informationgovernance.scot.nhs.uk/)

### Analysis

#### Qualitative Analysis

Free-text comments were analysed using thematic analysis,[19] employing an inductive approach – coding and theme development were driven by the content of the comments. Analysis of the large data-set was carried out using a structured approach.[20] The data were divided into responses for each of the comment boxes, creating seven data-sets. These data-sets were initially analysed separately, before being considered as a whole during the creation of themes. One researcher (MC) familiarised herself with the data for each comment box by reading all of the responses. Notes were made of any potential codes for each individual data-set by identifying recurring words or units of meaning. A second researcher (MW) familiarised herself with a random sample of the responses and the two researchers discussed and agreed coding decisions. In order to further structure the data, responses were sorted into first order codes based on whether the comment was (i) positive; (ii) negative; (iii) factual/neutral, for example ‘no treatment required after operation’; (iv) irrelevant/miscellaneous, for example ‘operation at (hospital name removed)’; (v) both positive and negative. Comments which were factual/neutral or irrelevant/miscellaneous were not included in

1  
2  
3 further analysis. MC then applied second order codes to all remaining comments in each individual  
4 data-set. Because the second order codes had been derived inductively from the data, the coding  
5 sheet was different for each of the seven data-sets. Comments were given as many codes as were  
6 appropriate to cover the content of the comment. Comments were then grouped by second order  
7 code and re-read and compared in order to check for consistency of meaning within the code.  
8 During this process of constant comparison, codes were amalgamated, or new codes were created  
9 as differences in meaning were identified. A third researcher (PA) checked first and second order  
10 coding decisions for a random 5% of the comments. Any discrepancies or disagreements (of which  
11 there were only a small number) were discussed by the team, and adjustments made if necessary.  
12 Two researchers (MC and MW) worked together to compare, contrast and consolidate codes by  
13 identifying similar codes and discussing differences across the seven comment boxes. Codes which  
14 shared similar meaning were amalgamated into sub-themes, and code frequencies were measured  
15 to give an indication of the prominence of different sub-themes. Sub-themes were then mapped by  
16 MW and MC into overarching themes which encompassed and described the main issues highlighted  
17 in the data.  
18  
19  
20

### 21 Quantitative Analysis

22 First order positive and negative coding for each of the comments, and the overarching positive and  
23 negative themes, were analysed by key demographics – gender, age, socioeconomic status,  
24 employment status, tumour group and health board - using chi-squared tests.  
25

26 Due to the low number of respondents in certain categories, brain, central nervous system and  
27 sarcoma cancer types were merged, as were the age bands 16-25 years and 26-35 years, and the  
28 categories of student and unemployed/looking for work. Comments from three rural health boards  
29 (NHS Orkney, NHS Shetland, and NHS Western Isles) were omitted due to having less than 5  
30 respondents who made at least one free-text comment.  
31  
32  
33  
34  
35  
36  
37  
38  
39  
40  
41  
42  
43  
44  
45  
46  
47  
48  
49  
50  
51  
52  
53  
54  
55  
56  
57  
58  
59  
60

## Findings

4,835 patients completed the survey, a 61% response rate. Of those patients, 2,663 (55%) left at least one free-text comment. There were no major differences in clinical or sociodemographic characteristics between those respondents who left at least one comment, and all respondents to the survey (Table 2). In total 6,961 comments were made by respondents. Overall, more positive (2,528) than negative (1,969) comments were made, a ratio of 1:0.78. Positive comments (average 24 words) tended to be shorter, more generic and less detailed than negative comments (average 43 words). Respondents made more positive than negative comments for all comment boxes except Comment Box 1 (the lead up to diagnosis), where a significantly greater number of negative comments were made (571 negative, 369 positive,  $\chi^2(6)=200.6$ ,  $p<0.001$ ).

### Qualitative Findings

#### Positive comments

Themes emerging from the positive comments are illustrated with quotes in Table 3. The majority of these comments reflected a generally positive experience, with respondents describing their care as good, very good or excellent. Many of these positive comments lacked any detail as to which aspects of the experience were particularly valued by patients.

Where respondents did give more detail about the aspects of care which gave them a positive experience, the most common theme was *Good Support*. Within this theme, respondents described being cared for both practically and emotionally, and being treated as an individual. Comments about *Good Support* related to care received from NHS staff, in particular from clinical nurse specialists and GPs, and also to support received through a range of charities. However, many participants commented that they had found out about the support available from charities through word of mouth e.g. from other patients rather than having been signposted by NHS staff.

Another common positive theme was *Information*, with participants describing how much they valued receiving clear information and thorough explanations of their cancer and treatment, including treatment options. The manner in which information was conveyed was also important, with participants appreciating sensitive communication from staff who gave them the time to process information and ask questions.

Further positive comments related to receiving *Good Clinical Care*. Respondents commented on treatment going well, good symptom management, and having faith in the clinical competence of staff. Participants expressed their confidence when they felt that they were being treated by a cohesive team, appreciating communication and continuity of care. Many participants were relieved and grateful that their GP had identified symptoms and organised diagnostic testing for cancer.

Respondents commented positively on *Efficient Processes*, mainly in relation to the speed of treatment, both in referral for tests before diagnosis, and in the efficient running of outpatient clinics. The smooth running and speed of various national screening programmes was also commented on favourably.

The final distinct positive theme suggested by the data was *Trust In The System*, with respondents particularly valuing knowledgeable staff, and a collaborative and inclusive approach to decision making about treatment.

#### Negative comments

Four broad themes emerged from analysis of the negative comments in the survey. These themes suggest there are two key issues which lead to patients having a negative experience of cancer care,



1  
2  
3 (i) *Not feeling confident or secure within the system*, and (ii) *Not feeling that individual needs were*  
4 *met*. The comments made by participants suggest the way services and environments are set up  
5 (which we termed *Structures*) and the organisation of care and treatment (which we termed  
6 *Processes*) can contribute to both these experiences. A number of sub-themes were identified within  
7 these four overarching themes, and these are illustrated by selected quotes in Table 4.  
8

9  
10 Although there were not as many negative comments as there were positive, the negative  
11 comments were much more specific and detailed, and gave a very clear picture of where  
12 improvement strategies could focus in order to enhance patients' experiences of cancer care.  
13

14 The theme with the most negative comments, *'Not feeling confident or secure within the system'*,  
15 represented a number of sub-themes (Table 4). The most common sub-theme was generated from  
16 comments about receiving *poor care*, particularly inadequate symptom management. Comments  
17 suggested that care was perceived to be poorer at night and at weekends, as well as on general  
18 rather than specialist wards. Many respondents described deficiencies in care and support *after*  
19 *treatment* had ended, including not receiving sufficient contact or emotional support and feeling  
20 isolated and alone; not being sure who to contact when they had cancer or treatment related  
21 problems; not receiving enough help with management of side-effects; and feeling that they  
22 received inadequate information about ongoing monitoring. A concern for some respondents was  
23 the lack of contact or support they received from their GP practice, community nurse or district  
24 nurse. Concerns about the role of primary care in the cancer experience were also reflected in  
25 comments about *difficulties getting into the system*. The majority of comments in this sub-theme  
26 described the delays and multiple visits to GPs experienced by some participants before they were  
27 referred for diagnostic tests. However, other issues with the lead up to diagnosis were not with  
28 primary care, but with participant's understanding of diagnostic testing, reflected in comments  
29 about *lack of faith in the system*. Some participants described their confusion that diagnostic tests or  
30 screening had not identified cancer. Many respondents also lost confidence in the system when they  
31 were given *inconsistent or incorrect information* by different health professionals involved in their  
32 care. Others described a feeling of being in limbo because of waits and delays between one stage of  
33 treatment and the next, and a lack of communication during these uncertain and difficult times.  
34  
35  
36

37 The second core theme which emerged was *'Not feeling that individual needs were met'*. Within this  
38 theme the greatest number of comments related to information not being sufficient or specific  
39 enough to meet patients' individual needs. Some patients were clearly overwhelmed by the amount  
40 of information they received, but most expressed a wish that they had been given more detailed and  
41 honest information about treatment options, side effects and self-management, as well as about  
42 other services they could access for specific support and information e.g. on financial issues. Many  
43 participants gave examples of poor communication during their experience of being treated for  
44 cancer, illustrating incidents where members of staff were perceived as insensitive, rude or  
45 dismissive. Other communication problems related to the way some patients had been told they had  
46 cancer, with many feeling that the conversation was vague, rushed or not handled sensitively. Lack  
47 of emotional support was also mentioned by many respondents, particularly if they did not have  
48 access or were not referred to a clinical nurse specialist or Macmillan service. Some felt they had  
49 not been listened to, or they experienced a lack of continuity in support (e.g. when staff changed,  
50 went on holiday or were not available). Many participants expressed feelings of isolation and  
51 loneliness, both during and particularly after treatment, because they did not receive the support  
52 they needed.  
53  
54  
55

56  
57 The negative impact of *Structures* and *Processes* on experiences of cancer care was expressed  
58 through a considerable number of comments related to the way in which services were set up and  
59  
60

1  
2  
3 organised. The most common issue under the theme of *Processes* (the organisation of care and  
4 treatment) was waits and delays, covering waiting for appointments to be scheduled, waiting  
5 between one thing and the next thing happening, and waiting on the day of appointments. Many  
6 patients specifically mentioned waiting on the day of chemotherapy appointments, with some  
7 describing waits of several hours before their chemotherapy commenced. Other unsatisfactory  
8 processes related to experiences of ineffective and unreliable communication systems. Many  
9 participants described inefficient administrative procedures, including delays in letters being  
10 received by or sent to GPs; appointments not being arranged; and appointments being cancelled or  
11 postponed without adequate communication. One of the most common sources of concern was that  
12 monitoring and follow-up appointments were not always arranged in line with the expectations that  
13 had been set by clinicians, leaving considerable room for uncertainty and worry. Other experiences  
14 included notes going missing, problems with call handling, poor communication between  
15 departments, and different sites not having access to full notes, all contributing to participants  
16 feeling passed around or feeling that their care was fragmented.  
17  
18

19  
20 Participants also described a number of ways in which aspects of the care environment impacted  
21 negatively on their experiences. Particular issues highlighted under the theme of *Structures* were  
22 related to lack of privacy, bed availability or aspects of comfort on wards (e.g. meals, bathrooms)  
23 difficulties with transport and inadequate staffing levels.  
24

### 25 Quantitative Analysis

26 Differences in the proportion of positive to negative comments by demographics (gender, age,  
27 socioeconomic status, employment status, tumour group and health board) were analysed using chi-  
28 squared tests for each of the seven comment boxes. There were no significant differences in the  
29 proportion of positive to negative comments across any of the demographics for comment box 6  
30 (chemotherapy/radiotherapy treatment) or comment box 7 (anything else about the experience of  
31 cancer care), except for an age effect in comment box 7 (with a greater proportion of negative  
32 comments in younger people).  
33  
34

35 There were no significant differences in the proportion of positive to negative comments across any  
36 of the Comment Boxes by hospital board.  
37

38 There were significant differences in the experience of cancer care by age and employment status  
39 across the first five comment boxes (Table 5). Younger participants were less likely to report a  
40 positive experience compared to participants over age 66, across all comment boxes except  
41 Comment Box 6 (chemotherapy/radiotherapy). A greater proportion of participants who worked full  
42 time, or who didn't work because they were either unemployed, a student, or had an illness or  
43 disability, were negative about their experiences of cancer care across the first five comment boxes,  
44 whereas a greater than expected proportion of participants who were retired were positive about  
45 their experiences of cancer care.  
46  
47

48 There were significant differences in the experience of cancer care by tumour group across the first  
49 five comment boxes. There was a trend for participants with less common cancer types (e.g.  
50 haematological, head and neck, gynaecological, brain, CNS, sarcoma and urological cancers) to make  
51 proportionately more negative comments about their experience of the lead up to diagnosis  
52 (Comment Box 1). There was a trend for respondents with breast and urological cancers to report a  
53 proportionately greater number of negative experiences about their involvement in decision making,  
54 the support they received and inpatient care (Comment Boxes 2, 3, 4). Participants with lung cancer  
55 tended to make a greater proportion of positive comments about their experiences of support  
56 received, inpatient and outpatient care. Finally, participants with upper gastrointestinal and head  
57  
58  
59  
60

1  
2  
3 and neck cancers made a greater proportion of negative comments about their experience of day  
4 patient/outpatient care (Comment Box 5).  
5

6 There were significant gender differences in the proportion of positive to negative comments for the  
7 way decisions were made about treatment (male 66.9% positive, female 49.3% positive), and  
8 participants' experience of the support they received (male 79.5% positive, female 61.0% positive),  
9 with men being more likely than women to report a positive experience. This gender difference is  
10 significant in both participants with and without breast cancer, indicating it is not merely a breast  
11 cancer effect. There were no significant gender differences across any of the other Comment Boxes.  
12

13 The only significant difference in the proportion of positive to negative comments by socioeconomic  
14 status was for inpatient care (Comment Box 4), where the least deprived participants made a greater  
15 proportion (46.6%) of negative comments about their experience than participants from any of the  
16 other groups (34.8%, 28.2%, 33.1%, 38.9% for Scottish Index of Multiple Deprivation groups 1-4  
17 respectively).[21]  
18  
19

20 Further analysis of the individual positive and negative themes revealed no differences in any of the  
21 positive themes by any of the demographics, and the same trends in the negative themes as have  
22 been described for the overall negative comments.  
23  
24  
25  
26  
27  
28  
29  
30  
31  
32  
33  
34  
35  
36  
37  
38  
39  
40  
41  
42  
43  
44  
45  
46  
47  
48  
49  
50  
51  
52  
53  
54  
55  
56  
57  
58  
59  
60

## Discussion

This is the first time that a nationwide survey has been conducted of Scottish cancer patients' experience of their care. Providing seven free-text comment boxes gave participants the opportunity to expand on particular aspects of their care which were important to them or had an impact on their overall experience. The analysis of the comments revealed that the majority of patients had a positive experience of care. However, a significant minority had a negative experience, and this was particularly the case in the lead-up to diagnosis. The generic nature of positive comments meant that there was less detailed analysis of the aspects of care which patients value. However, good support, clear information, good clinical care and efficient processes all emerged as positive themes for participants. Negative comments tended to be more detailed and specific and therefore provided richer material for analysis. Four themes emerged from the negative comments, highlighting the importance, to people with cancer, of feeling confident in the system and being treated as an individual. Analysis of the negative comments revealed that many participants had experienced problems with the way care was organised and services were set up. Analysis of the positive and negative comments indicated that participants who were younger, who worked full time, or who had certain types of cancer were more likely to report negative experiences.

A strength of this study was the structured approach followed to analyse the large data-set.[20] A team of independent researchers conducted the analysis and the process was transparent and rigorous. Sending surveys to an entire cohort of patients maximised the opportunities to capture a wide range of experiences. However, there is a risk of bias in free-text responses towards patients who are more literate, have English as a first language, and who do not have learning difficulties. Including seven free-text comment boxes placed throughout the survey gave participants the opportunity to reflect and comment on different stages of the cancer journey. The free-text questions focused on experiences of, rather than satisfaction with, care, removing the risks inherent in making assumptions about how patients evaluate satisfaction.[22]

The SCPES was based on a survey which has been previously conducted in England and Wales, which asked participants what was particularly good, and what could have been improved about their cancer experience.[18] Analysis of the free-text comments of London participants,[23] and Welsh participants,[14] revealed a greater proportion of positive to negative comments (1:0.51 London; 1:0.61 Wales) than in the SCPES (1:0.78). This effect may be because the SCPES did not specifically ask patients to describe what they found good about their care. There were many similarities in the themes identified in all three surveys, including that patients commented on receiving poorer care at nights and at the weekend; and on issues with the role of primary care in cancer diagnosis. Many participants in the SCPES noted poorer care when receiving care from staff who they perceived not to be cancer specialists. Analysis of English survey results indicated that patients in Trusts which had more cancer specialist nurses, reported a better experience of care coordination and emotional support.[24] The issues around lack of involvement and choice in decision making, being given inconsistent or inappropriate information, and lack of signposting to support services, which were highlighted in the SCPES, did not appear to emerge strongly in the free-text analysis of other surveys. It is not clear whether this is an effect of the difference in free-text questions and analysis between the surveys or if it reflects actual differences in the experience of cancer patients between these countries. Nonetheless, communication emerged as a theme in all three surveys, both within health services and between health professionals and patients. Designing interventions to improve communication is a critical challenge in improving the delivery of cancer care.[25-26]

Two major aims of the current Scottish Government's Cancer Strategy are to improve cancer detection and aftercare.[27] Our analysis suggests that many patients have significant problems with

1  
2  
3 these two phases of care at present. There have been guidelines for the referral of suspected cancer  
4 cases in Scotland since 2002,[28] which have been revised in light of new research in 2007 and  
5 2014;[29] NICE also published suspected cancer referral guidelines in 2015.[30] The Scottish  
6 Government launched the Detect Cancer Early Programme in 2012, developing projects with the  
7 NHS to increase screening uptake, increase diagnostic capacity, and work with GPs to promote  
8 referral or investigation for suspected cancer cases.[31] Free-text comments in the SCPES suggest  
9 that patients were less happy with the lead up to diagnosis than at any other point in their  
10 treatment. Some made positive comments about the efficiency of national screening programmes,  
11 however, the majority of respondents were negative about the lead up to diagnosis, particularly  
12 commenting on experiencing long waits and delays, having difficulty getting into the system, and  
13 poor communication. The timing of the SCPES may be a factor in people having a less good  
14 experience of the lead up to diagnosis, with participants for the survey having received a diagnosis  
15 between July 2013 and March 2014. It is possible the Detect Cancer Early Programme had not yet  
16 had an impact on processes around diagnosis for the cohort in this study. However, we found that  
17 patients with less common cancer types made a greater proportion of negative comments about the  
18 lead up to diagnosis. The Detect Cancer Early Programme has focused on breast, colorectal and lung  
19 cancers, as they are the most common cancers in Scotland;[32] our results suggest that patients with  
20 less common cancers are not benefiting from similar improvements to the early diagnosis system.  
21 Further, referral guidelines, and improvements in the capacity of screening and diagnostic services  
22 are aimed at tackling processes, rather than the patients' experiences of those processes. One of the  
23 main problems with the lead up to diagnosis identified in this study was around poor communication  
24 at the time of diagnosis, with participants describing feeling that staff did not listen to them, or that  
25 they were not given information appropriate to their needs at that time. Many participants  
26 described feeling confused and anxious as a result of the way they were told about their diagnosis,  
27 and others experienced delays and confusion around diagnostic testing and once they got into the  
28 hospital system. Results from the SCPES suggest that improving diagnostic pathways for less  
29 common cancers, and improving communication at the time of diagnosis would enhance the  
30 experience of this particularly worrying and stressful time. These results chime with those of another  
31 recently published analysis of free-text comments, which illustrates that patients may move  
32 backwards and forwards within the diagnostic pathway and that this is often complex and difficult to  
33 navigate.[33]

34  
35  
36  
37  
38  
39  
40 The relatively large proportion of negative comments indicate that not all cancer patients in Scotland  
41 are receiving person-centred care. From the patient's perspective, all stages of the care continuum  
42 and every interaction with services have an impact on their experience. This survey identified  
43 problems with both interactions with health professionals and services and linkages between  
44 services. Participants described interacting with many different services, including GPs, charities,  
45 cancer services and other specialist services – coordination of care between these services arose as  
46 an issue in multiple free-text comments, suggesting problems with fragmentation of care, lack of  
47 signposting, inconsistent information, and the patient not knowing who to contact. Understanding  
48 and improving processes for administration, communication and coordination between services is  
49 vital to ensure a positive and high quality experience for the patient.[25] While improvement at an  
50 individual service level is important to enhance clinical effectiveness and safety, improvement  
51 efforts also need to take a 'whole systems' view in order to impact on the overall patient experience.  
52 A recent review of the relationship between integrated care and cancer patient experience found a  
53 positive association between greater integration of care and both patient experience, and  
54 professionals' behaviour and attitudes in cancer care, identifying the importance of (i) having a case  
55 manager or navigator, (ii) the engagement of a multidisciplinary team in care and treatment, and (iii)

1  
2  
3 a continuous relationship between the case manager and healthcare professionals.[34] The results  
4 of the SCPES identified that participants were particularly positive about their experience when they  
5 felt they received treatment from a cohesive team, and negative about their experience when they  
6 felt they did not have a named contact who was available to help them with aspects of their care  
7 and provide information in a responsive and meaningful way.  
8

9  
10 The SCPES provides detailed information about the experience of cancer care at a system level in  
11 Scotland. However, a survey of this nature is anonymous and there is a time lag between the  
12 experience of care and analysis, meaning the results have no direct impact for individual  
13 participants. Also, due to the distributed care of patients with cancer, it can be difficult to identify  
14 particular parts of the service which would benefit from organisational change. The measurement of  
15 patient experience should be timely and focused in order to provide information which is actionable  
16 in specific services.[35] At an individual level, measurement of patient experience could provide  
17 valuable insight into issues with an individual's experience of care and provide real-time feedback to  
18 help identify and resolve unmet needs. The SCPES results suggest that when patients have a  
19 negative experience of care their confidence in the system is shaken and they may feel more  
20 vulnerable when treatment comes to an end. Macmillan's Recovery Package advocates that all  
21 cancer patients should receive a holistic needs assessment and care plan at key points of the cancer  
22 pathway, and a cancer care review completed by primary care within 6 months of the GP being  
23 informed of a patient's cancer diagnosis.[36] If rolled out for all patients, these conversations could  
24 provide an opportunity to assess and monitor patients' experience of care and provide a mechanism  
25 to resolve issues for individual patients as they move through the care pathway. Sensitive, reliable  
26 and service focused tools are needed to measure cancer patient experience in real-time to facilitate  
27 this process.[35,37]  
28  
29  
30

31 The analysis of the free-text comments in the SCPES has highlighted aspects of cancer care which are  
32 particularly important to patients. While many patients have a positive experience of cancer care,  
33 there are some key factors which contribute to negative experiences at all stages of the cancer  
34 pathway. The results of the survey provide important details of what matters to patients, suggesting  
35 areas for service improvement which will communicate to patients as individuals, and inspire greater  
36 confidence in the system of care. Our analysis also points to particular aspects of care which need  
37 attention, including the experience of the lead up to diagnosis, the integration of care, and  
38 monitoring patient experience in real-time in order to ensure that we are truly responsive to the  
39 needs of people with cancer.  
40  
41  
42  
43  
44  
45  
46  
47  
48  
49  
50  
51  
52  
53  
54  
55  
56  
57  
58  
59  
60

## References

- 1 The Health Foundation. Person-centred care made simple. 2014.  
[www.health.org.uk/sites/health/files/PersonCentredCareMadeSimple.pdf](http://www.health.org.uk/sites/health/files/PersonCentredCareMadeSimple.pdf) (accessed 21 Dec 2016).
- 2 Department of Health. High Quality Care For All: NHS Next Stage Review Final Report. London: The Stationery Office 2008.  
[www.gov.uk/government/uploads/system/uploads/attachment\\_data/file/228836/7432.pdf](http://www.gov.uk/government/uploads/system/uploads/attachment_data/file/228836/7432.pdf) (accessed 21 Dec 2016).
- 3 Doyle C, Lennox L, Bell D. A systematic review of evidence on the links between patient experience and clinical safety and effectiveness. *BMJ Open* 2013;3:e001570.
- 4 NHS England. Cancer News. [www.england.nhs.uk/cancer/2016/10/04/cancer-ratings/](http://www.england.nhs.uk/cancer/2016/10/04/cancer-ratings/) (accessed 21 Dec 2016).
- 5 Luxford K, Sutton S. How does patient experience fit into the overall healthcare picture? *Patient Experience Journal* 2014;1:20-27.
- 6 Ahmad AS, Ormiston-Smith N, Sasieni PD. Trends in the lifetime risk of developing cancer in Great Britain: comparison of risk for those born from 1930 to 1960. *Br J Cancer* 2015;112:943-7.
- 7 Arora NK, Reeve BB, Hays RD, et al. Assessment of quality of cancer-related follow-up care from the cancer survivor's perspective. *J Clin Oncol* 2011;29:1280-9.
- 8 Booij JC, Zegers M, Evers PM, et al. Improving cancer patient care: developments of a generic cancer consumer quality index questionnaire for cancer patients. *BMC Cancer* 2013;13:203.
- 9 Damman OC, Hendriks M, Sixma HJ. Towards more patient centred healthcare: A new consumer quality index instrument to assess patients' experiences with breast care. *Eur J Cancer* 2009;45:1569-77.
- 10 Malin JL, Ko C, Ayanian JZ, et al. Understanding cancer patients' experience and outcomes: Development and pilot study of the Cancer Care Outcomes Research and Surveillance patient survey. *Support Care Cancer* 2006;14:837-48.
- 11 Department of Health. National Cancer Patient Experience Survey Programme – 2010 National Survey Report. Quality Health 2010. [www.quality-health.co.uk/resources/surveys/national-cancer-experience-survey/2010-national-cancer-patient-experience-survey](http://www.quality-health.co.uk/resources/surveys/national-cancer-experience-survey/2010-national-cancer-patient-experience-survey) (accessed 21 Dec 2016)
- 12 Iversen HH, Holmboe O, Bjertnaes OA. The Cancer Patient Experiences Questionnaire (CPEQ): reliability and construct validity following a national survey to assess hospital cancer care from the patient perspective. *BMJ Open* 2012;2:e001437.
- 13 Quality Health. Cancer Patient Experience Survey 2015 All Northern Ireland Report. [www.quality-health.co.uk/resources/surveys/northern-ireland-cancer-patient-experience-survey/2015-northern-ireland-cancer-patient-experience-survey-reports](http://www.quality-health.co.uk/resources/surveys/northern-ireland-cancer-patient-experience-survey/2015-northern-ireland-cancer-patient-experience-survey/northern-ireland-cancer-patient-experience-survey-reports) (accessed 21 Dec 2016).
- 14 Bracher M, Corner DJ, Wagland R. Exploring experiences of cancer care in Wales: a thematic analysis of free-text responses to the 2013 Wales Cancer Patient Experience Survey (WCPES). *BMJ Open* 2016;6:e011830.
- 15 Scottish Government. Scottish Cancer Patient Experience Survey 2015/16.  
<http://www.gov.scot/Publications/2016/06/3957/downloads> (accessed 21 Dec 2016).

- 1  
2  
3 16 Asprey A, Campbell JL, Newbould J, et al. Challenges to the credibility of patient feedback in  
4 primary healthcare settings: a qualitative study. *Br J Gen Pract* 2013;63:e200-8.  
5  
6 17 Riiskjaer E, Ammentorp J, Kofoed PE. The value of open-ended questions in surveys on patient  
7 experience: number of comments and perceived usefulness from a hospital perspective. *Int J Qual*  
8 *Health Care* 2012;24:509-16.  
9  
10 18 Quality Health. National Cancer Patient Experience Survey.  
11 [http://www.ncpes.co.uk/index.php/reports/guidance/2486-2015-national-cancer-patient-](http://www.ncpes.co.uk/index.php/reports/guidance/2486-2015-national-cancer-patient-experience-survey-questionnaire/file)  
12 [experience-survey-questionnaire/file](http://www.ncpes.co.uk/index.php/reports/guidance/2486-2015-national-cancer-patient-experience-survey-questionnaire/file) (accessed 21 Dec 2016).  
13  
14 19 Braun V, Clarke V. Using thematic analysis in psychology. *Qual Res Psychol* 2006;3:77-101.  
15  
16 20 Namey E, Guest G, Thairu L, et al. Data reduction techniques for large qualitative data sets. In  
17 Guest G, MacQueen KM, eds. *Handbook for Team-Based Qualitative Research*. Plymouth, UK:  
18 AltaMira Press 2007:137-161.  
19  
20 21 Scottish Government. Introducing the Scottish Index of Multiple Deprivation 2016.  
21 [www.gov.scot/Resource/0050/00504809.pdf](http://www.gov.scot/Resource/0050/00504809.pdf) (accessed 21 Dec 2016).  
22  
23 22 Williams B. Patient satisfaction: a valid concept? *Soc Sci Med* 1994;38:509-16.  
24  
25 23 Wiseman T, Lucas G, Sangha A, et al. Insights into the experiences of patients with cancer in  
26 London: framework analysis of free-text data from the National Cancer Patient Experience Survey  
27 2012/2013 from the two London Integrated Cancer Systems. *BMJ Open* 2015;5:e007792.  
28  
29 24 Griffiths P, Simon M, Richardson A, et al. Is a larger specialist nurse workforce in cancer care  
30 associated with better patient experience? Cross-sectional study. *J Health Serv Res Policy*  
31 2013;18:39-46.  
32  
33 25 Dossett LA, Hudson JN, Morris AM, et al. the primary care provider (PCP)- cancer specialist  
34 relationship: a systematic review and mixed-methods meta-synthesis. *CA Cancer J Clin* Published  
35 Online First: 11 Oct 2016. doi: 10.3322/caac.21385.  
36  
37 26 Easley J, Miedema B, Carroll JC, et al. Coordination of cancer care between family physicians and  
38 cancer specialists: Importance of communication. *Can Fam Physician* 2016;62:e608-615.  
39  
40 27 Scottish Government. Beating Cancer: Ambition and Action. March 2016.  
41 <http://www.gov.scot/Publications/2016/03/9784/downloads> (accessed 21 Dec 2016).  
42  
43 28 Scottish Executive. Scottish referral guidelines for suspected cancer. February 2007.  
44 [http://www.sehd.scot.nhs.uk/mels/HDL2007\\_09.pdf](http://www.sehd.scot.nhs.uk/mels/HDL2007_09.pdf) (accessed 21 Dec 2016).  
45  
46 29 Healthcare Improvement Scotland. Scottish referral guidelines for suspected cancer. August 2014.  
47 [http://www.healthcareimprovementscotland.org/our\\_work/cancer\\_care\\_improvement/programme](http://www.healthcareimprovementscotland.org/our_work/cancer_care_improvement/programme_resources/scottish_referral_guidelines.aspx)  
48 [\\_resources/scottish\\_referral\\_guidelines.aspx](http://www.healthcareimprovementscotland.org/our_work/cancer_care_improvement/programme_resources/scottish_referral_guidelines.aspx) (accessed 21 Dec 2016).  
49  
50 30 Hamilton W, Hajioff S, Graham J, et al. Suspected cancer (part 2 – adults): reference tables from  
51 updated NICE guidance. *BMJ* 2015;350:h3044.  
52  
53 31 Scottish Government. Detect Cancer Early. [www.gov.scot/Topics/Health/Services/Cancer/Detect-](http://www.gov.scot/Topics/Health/Services/Cancer/Detect-Cancer-Early)  
54 [Cancer-Early](http://www.gov.scot/Topics/Health/Services/Cancer/Detect-Cancer-Early) (accessed 21 Dec 2016).  
55  
56 32 NHS Scotland Quality Improvement Hub. Detect Cancer Early. [www.qihub.scot.nhs.uk/quality-](http://www.qihub.scot.nhs.uk/quality-and-efficiency/cancer/detect-cancer-early.aspx)  
57 [and-efficiency/cancer/detect-cancer-early.aspx](http://www.qihub.scot.nhs.uk/quality-and-efficiency/cancer/detect-cancer-early.aspx) (accessed 21 Dec 2016).  
58  
59  
60



1  
2  
3 33 Parsonage RK, Hiscock J, Law R-J, et al. Patient perspectives on delays in diagnosis and treatment  
4 of cancer: a qualitative analysis of free-text data. *Br J Gen Pract* Published Online First: 21 Nov 2016.  
5 doi: [10.3399/bjgp16X688357](https://doi.org/10.3399/bjgp16X688357).  
6

7 34 Foglino S, Bravi F, Carretta E, et al. The relationship between integrated care and cancer patient  
8 experience: a scoping review of the evidence. *Health Policy* 2016;120:55-63.  
9

10 35 Manary MP, Boulding W, Staelin R, et al. The patient experience and health outcomes. *N Engl J*  
11 *Med* 2013;368:201-3.  
12

13 36 Macmillan Cancer Support. The Recovery Package: sharing good practice. 2015  
14 [www.macmillan.org.uk/ images/recovery-package-sharing-good-practice\\_tcm9-299778.pdf](http://www.macmillan.org.uk/images/recovery-package-sharing-good-practice_tcm9-299778.pdf)  
15 (accessed 21 Dec 2016).  
16

17 37 Saunders C, Carter D, Jordan A, et al. Cancer patient experience measures – an evidence review. *J*  
18 *Psychosoc Oncol* 2016;34:200-22.  
19  
20  
21  
22  
23  
24  
25  
26  
27  
28  
29  
30  
31  
32  
33  
34  
35  
36  
37  
38  
39  
40  
41  
42  
43  
44  
45  
46  
47  
48  
49  
50  
51  
52  
53  
54  
55  
56  
57  
58  
59  
60

Table 1 Comment boxes

|               | Question Topic: Is there anything else you would like to tell us about...       | Preceding Questionnaire Section Headings                                            |
|---------------|---------------------------------------------------------------------------------|-------------------------------------------------------------------------------------|
| Comment Box 1 | The lead-up to your cancer diagnosis, or the way you found out you had cancer   | Seeing your GP,<br>Diagnostic Tests,<br>Finding out what was wrong with you         |
| Comment Box 2 | The way decisions were made about your treatment                                | Deciding the best treatment for you                                                 |
| Comment Box 3 | The support you received (including from a clinical nurse specialist)           | Clinical Nurse Specialist,<br>Support for people with cancer                        |
| Comment Box 4 | The care you received when you had an operation or stayed overnight in hospital | Operations,<br>Hospital care as an inpatient                                        |
| Comment Box 5 | The day patient/outpatient care you received                                    | Hospital care as a day patient/outpatient                                           |
| Comment Box 6 | Your chemotherapy/radiotherapy treatment                                        | Radiotherapy and chemotherapy                                                       |
| Comment Box 7 | Your experiences of cancer care                                                 | Home care and support,<br>Care from your General Practice,<br>Your overall NHS Care |

Table 2 Demographic details of all respondents and those that left at least one comment

| Respondent characteristics              | Left at least one comment |            | All respondents       |            |
|-----------------------------------------|---------------------------|------------|-----------------------|------------|
|                                         | Number of respondents     | Percentage | Number of respondents | Percentage |
| <b>Age</b>                              |                           |            |                       |            |
| 16-34                                   | 47                        | 2          | 85                    | 2          |
| 35-44                                   | 130                       | 5          | 182                   | 4          |
| 45-54                                   | 369                       | 14         | 610                   | 13         |
| 55-64                                   | 649                       | 25         | 1,136                 | 24         |
| 65-74                                   | 864                       | 34         | 1,630                 | 35         |
| Age 75+                                 | 512                       | 20         | 998                   | 22         |
| <b>Gender</b>                           |                           |            |                       |            |
| Female                                  | 1,520                     | 59         | 2,659                 | 57         |
| Male                                    | 1,072                     | 41         | 2,045                 | 43         |
| <b>Employment status</b>                |                           |            |                       |            |
| Don't work due to illness or disability | 227                       | 9          | 383                   | 8          |
| Other                                   | 42                        | 2          | 89                    | 2          |
| Retired                                 | 1,568                     | 60         | 2,931                 | 62         |
| Unemployed/looking for work             | 21                        | 1          | 43                    | 1          |
| Work full time/In full time education   | 458                       | 18         | 805                   | 17         |
| Work part time                          | 289                       | 11         | 481                   | 10         |
| <b>SIMD quintile (2012)</b>             |                           |            |                       |            |
| (most deprived) 1                       | 327                       | 13         | 708                   | 16         |
| 2                                       | 453                       | 18         | 804                   | 18         |
| 3                                       | 530                       | 21         | 911                   | 20         |
| 4                                       | 572                       | 23         | 1,004                 | 22         |
| (least deprived) 5                      | 644                       | 25         | 1,079                 | 24         |
| <b>Tumour group</b>                     |                           |            |                       |            |
| Brain/Central Nervous System            | 21                        | 1          | 39                    | 1          |
| Breast                                  | 659                       | 25         | 1,187                 | 25         |
| Colorectal/Lower gastrointestinal       | 427                       | 16         | 721                   | 15         |
| Gynaecological                          | 213                       | 8          | 359                   | 7          |
| Haematological                          | 215                       | 8          | 379                   | 8          |
| Head and Neck                           | 148                       | 6          | 264                   | 5          |
| Lung                                    | 163                       | 6          | 292                   | 6          |
| Prostate                                | 290                       | 11         | 592                   | 12         |
| Sarcoma                                 | 20                        | 1          | 34                    | 1          |
| Skin                                    | 70                        | 3          | 129                   | 3          |
| Upper Gastrointestinal                  | 118                       | 4          | 189                   | 4          |
| Urological                              | 173                       | 6          | 308                   | 6          |
| Other/Tumour Group Unknown              | 146                       | 5          | 342                   | 7          |

Table 3 Summary of the positive themes

| Themes                               | Number of comments | Quotes                                                                                                                                                                                                                                                                                                                                                                                                                                           |
|--------------------------------------|--------------------|--------------------------------------------------------------------------------------------------------------------------------------------------------------------------------------------------------------------------------------------------------------------------------------------------------------------------------------------------------------------------------------------------------------------------------------------------|
| <b>Generally positive experience</b> | 1995               | All in all very good.<br><i>Female, 66-75, Breast Cancer</i>                                                                                                                                                                                                                                                                                                                                                                                     |
| <b>Good support</b>                  | 738                | Clinical nurse was extremely helpful and gave me great friendship and support during this horrendous time. I great font of knowledge with financial help, the benefits I could apply for. She assisted in the filling out of complicated forms. A real treasure.<br><i>Female, 66-75, Haematological Cancer</i>                                                                                                                                  |
| <b>Information</b>                   | 508                | I had/have an excellent consultant surgeon by the name of Mr [name removed]. I have had the best of care and attention from him. Despite being an extremely busy man, he always has time to spend with me and my wife at appointments. He explains everything very clearly and answers our questions thoroughly. In my opinion I couldn't ask for a better man to care for me.<br><i>Male, 66-75, Colorectal / Lower Gastrointestinal Cancer</i> |
| <b>Good clinical care</b>            | 362                | Despite complications and infections arising from my prostate removal the care and attention that I received from [name removed] and his team of doctors and nurses was of the highest order. I could have no complaints. Very impressive urology care team.<br><i>Male, 66-75, Prostate Cancer</i>                                                                                                                                              |
| <b>Efficient processes</b>           | 279                | I was admitted to the [hospital name removed] after presenting to my GP with [condition removed]. Had ultrasound, MRI and CT scan all within five days and due to tumour was transferred to the [hospital name removed], scoped and biopsy taken and I had my full diagnosis within three weeks and chemotherapy started within five weeks.<br><i>Male, 51-65, Upper Gastrointestinal Cancer</i>                                                 |
| <b>Trust in the system</b>           | 81                 | Discussions were business-like. Facts were presented to me, questions answered and information was very clear and decisions agreed. It was a very democratic, and respectfully conducted process.<br><i>Male, 66-75, Upper Gastrointestinal Cancer</i>                                                                                                                                                                                           |

Table 4 Summary of the negative themes and sub-themes

| Themes                                                   | Sub Themes                                | Number of comments | Quotes                                                                                                                                                                                                                                                                                                                                                                                                                                                                                                                                                                                                                                                                                                                                                                                             |
|----------------------------------------------------------|-------------------------------------------|--------------------|----------------------------------------------------------------------------------------------------------------------------------------------------------------------------------------------------------------------------------------------------------------------------------------------------------------------------------------------------------------------------------------------------------------------------------------------------------------------------------------------------------------------------------------------------------------------------------------------------------------------------------------------------------------------------------------------------------------------------------------------------------------------------------------------------|
| <b>Not feeling confident or secure within the system</b> | Poor care                                 | 372                | Post-op I could hear the recovery nurses talking about my pain relief. I was in agony and they did not believe me as I had had a lot of analgesia. I left recovery in agony. Eventually I got oramorph on the ward and that took it away. I felt the ward staff inexperienced in dealing with the issues of cancer and very few made eye contact when I asked questions about it.<br><i>Female, 36-50, Breast Cancer</i>                                                                                                                                                                                                                                                                                                                                                                           |
|                                                          | Inadequate aftercare                      | 262                | When I was discharged from ward, I could have been going home with a finger bandage. No instructions as to care or further help was given.<br><i>Female, 51-65, Urological Cancer</i>                                                                                                                                                                                                                                                                                                                                                                                                                                                                                                                                                                                                              |
|                                                          | Difficulty getting into the system        | 200                | Looking back I have concerns about my GP Practice. They took far too long and it took far too many visits for me to be referred for a scan. I had testicular cancer. The issue seemed to be a view that there was no need to physically examine the testicle. It seems when it was examined, the need for an immediate referral was very obvious. Had I been clinically examined earlier, I would have been referred for a scan much earlier. The doctor who eventually did refer me to radiology made a very odd passing comment. I complained about pain. After the examination this doctor said that I didn't seem to react much if the area was tender and painful. It's odd that I was questioned for trying be stoic and not engage in histrionics.<br><i>Male, 36-50, Urological Cancer</i> |
|                                                          | Inconsistent or inappropriate information | 158                | I received conflicting and confusing information from [number removed] different doctors and there was no support and I felt each doctor just wanted me out as quickly as possible.<br><i>Female, 51-65, Tumour Group not recorded</i>                                                                                                                                                                                                                                                                                                                                                                                                                                                                                                                                                             |
|                                                          | Lack of faith in the system               | 158                | You're just left between appointments with no follow up scans or nothing. Unless you have had cancer, people don't understand how important it is.<br><i>Female, 51-65, Breast Cancer</i>                                                                                                                                                                                                                                                                                                                                                                                                                                                                                                                                                                                                          |
|                                                          | Inadequate contact                        | 50                 | Very little contact with oncology doctor during or after treatment.<br><i>Male, 76 and over, Prostate Cancer</i>                                                                                                                                                                                                                                                                                                                                                                                                                                                                                                                                                                                                                                                                                   |
|                                                          | <b>Total</b>                              |                    | <b>1200</b>                                                                                                                                                                                                                                                                                                                                                                                                                                                                                                                                                                                                                                                                                                                                                                                        |
| <b>Not feeling that individual</b>                       | Lack of Information                       | 407                | The effects of radiotherapy and chemo however should have been more emphasised. I thought I was going to die after treatment, I suffered horrendous pain all over.                                                                                                                                                                                                                                                                                                                                                                                                                                                                                                                                                                                                                                 |

|                       |                                           |             |                                                                                                                                                                                                                                                                                                                                                                                                          |
|-----------------------|-------------------------------------------|-------------|----------------------------------------------------------------------------------------------------------------------------------------------------------------------------------------------------------------------------------------------------------------------------------------------------------------------------------------------------------------------------------------------------------|
| <b>needs were met</b> |                                           |             | <i>Male, 51-65, Head and Neck Cancer</i>                                                                                                                                                                                                                                                                                                                                                                 |
|                       | Poor communication                        | 345         | Most of the staff were approachable. The consultant was offhand and dismissive, especially when explaining the side effects - discussion with fellow patients revealed that this was a common issue. The consultant did not fully explain procedures nor attempt to follow up. The impression given was that they were busy and only had a short time to consult.<br><i>Female, 51-65, Breast Cancer</i> |
|                       | Poor Emotional Support and Responsiveness | 270         | It's so important for nurses to be able to offer emotional support. I feel that the nurses were always so busy and quite distant at <name removed>. Often conversations about my care at bedside but didn't look at me/involve me.<br><i>Female, 51-65, Colorectal/Lower Gastrointestinal Cancer</i>                                                                                                     |
|                       | Involvement and choice                    | 97          | Having said I wanted to know everything I thought I would be treated by doctors as a partner in my care. Instead I felt like a passive battleground with the doctors on one side and the disease on the other.<br><i>Female, 51-65, Haematological Cancer</i>                                                                                                                                            |
|                       | Specific and unusual circumstances        | 34          | I had to convince my GP for the test when my [family members removed] died from it. They felt I was too young at [age removed] to be tested, despite being a family history of prostate cancer.<br><i>Male, 51-65, Prostate Cancer</i>                                                                                                                                                                   |
|                       | Family                                    | 21          | Although my treatment in hospital was excellent and I was kept very well informed, my family found it very difficult to find anyone to give them information about me.<br><i>Male, 76 and over, Urological Cancer</i>                                                                                                                                                                                    |
|                       | <b>Total</b>                              | <b>1174</b> |                                                                                                                                                                                                                                                                                                                                                                                                          |
| <b>Structures</b>     | Unsuitable or uncomfortable environment   | 145         | I found the care in unit [name removed] very good, I found the general ward to be chaotic, too busy, very poorly maintained physical environment, very poor toilet facilities, real dignity issues for colorectal patients.<br><i>Female, 36-50, Colorectal/Lower Gastrointestinal Cancer</i>                                                                                                            |
|                       | Staffing Levels                           | 143         | During the day the ward was well staffed with qualified cancer nurses, although they were under severe pressure at times. At night, staffing was inadequate to cope with the demands of very ill patients and at times treatment and medication were badly delayed due to emergencies.<br><i>Female, 66-75, Haematological Cancer</i>                                                                    |
|                       | Privacy                                   | 67          | When doctors attend your bed to tell you vital and personal and private information, closing the curtain around you is not enough privacy.<br><i>Male, 51-65, Upper Gastrointestinal Cancer</i>                                                                                                                                                                                                          |
|                       | Transport                                 | 49          | The only thing was chemotherapy treatment. I had                                                                                                                                                                                                                                                                                                                                                         |

|                  |                                                               |             |                                                                                                                                                                                                                                                                                                                                                                                                                                                                                                      |
|------------------|---------------------------------------------------------------|-------------|------------------------------------------------------------------------------------------------------------------------------------------------------------------------------------------------------------------------------------------------------------------------------------------------------------------------------------------------------------------------------------------------------------------------------------------------------------------------------------------------------|
|                  |                                                               |             | to be at the hospital by 8pm each week and to get there I had to arrange a taxi and was told this would be repaid to me if I kept the receipts. When I claimed I was told this was no longer the case.<br><i>Male, 51-65, Lung Cancer</i>                                                                                                                                                                                                                                                            |
|                  | <b>Total</b>                                                  | <b>404</b>  |                                                                                                                                                                                                                                                                                                                                                                                                                                                                                                      |
| <b>Processes</b> | Waits and delays                                              | 454         | My original operation was cancelled several times at (after pre-op procedures) and delayed. Operation was much more extensive as a result of delays and eventually carried out almost 5 months after discovery of cancer.<br><i>Male, 66-75, Colorectal / Lower Gastrointestinal Cancer</i>                                                                                                                                                                                                          |
|                  | Ineffective and unreliable processes (organisational systems) | 289         | The return of my cancer was picked up at a routine scan and I was told I would likely need further surgery. It is now six months later and I still have not had it and have no further date. This has mainly been caused by a delay in communication between local and city hospital and by different departments within same hospital failing to communicate with each other. Again during all this time no one has discussed or confirmed it is cancer.<br><i>Female, 36-50, Urological Cancer</i> |
|                  | Fragmented care                                               | 276         | Diagnosis, treatment and surgery was done over four separate hospitals and venues. Due to this, information was sometimes missed out or assumed given by someone else. Due to this situation it was difficult for me to know who to contact when I needed advice.<br><i>Female, 51-65, Breast Cancer</i>                                                                                                                                                                                             |
|                  | <b>Total</b>                                                  | <b>1019</b> |                                                                                                                                                                                                                                                                                                                                                                                                                                                                                                      |

Table 5 Proportion of positive comments by Comments Box 1-5

|                                         | <b>Lead-up to diagnosis<br/>(Box 1)</b> | <b>The way decisions were made about treatment<br/>(Box 2)</b> | <b>The support you received<br/>(Box 3)</b> | <b>Inpatient care<br/>(Box 4)</b> | <b>Day or outpatient care<br/>(Box 5)</b> |
|-----------------------------------------|-----------------------------------------|----------------------------------------------------------------|---------------------------------------------|-----------------------------------|-------------------------------------------|
|                                         | <b>Positive<br/>N (%)</b>               | <b>Positive<br/>N (%)</b>                                      | <b>Positive<br/>N (%)</b>                   | <b>Positive<br/>N(%)</b>          | <b>Positive<br/>N (%)</b>                 |
| <b>Age</b>                              |                                         |                                                                |                                             |                                   |                                           |
| 16-35                                   | 6 (22.2)                                | 4 (26.7)                                                       | 9 (60.0)                                    | 8 (47.1)                          | 2 (25.0)                                  |
| 36-50                                   | 41 (29.5)                               | 40 (50.0)                                                      | 60 (60.0)                                   | 50 (53.2)                         | 30 (46.9)                                 |
| 51-65                                   | 118 (32.6)                              | 115 (48.1)                                                     | 178 (62.5)                                  | 165 (55.6)                        | 109 (61.9)                                |
| 66-75                                   | 133 (46.0)                              | 115 (67.6)                                                     | 173 (75.9)                                  | 174 (70.2)                        | 98 (76.6)                                 |
| 76 and over                             | 60 (60.6)                               | 55 (71.4)                                                      | 63 (75.9)                                   | 73 (74.5)                         | 49 (75.4)                                 |
|                                         | $\chi^2(4)=40^{**}$                     | $\chi^2(4)=29^{**}$                                            | $\chi^2(4)=16.3^{**}$                       | $\chi^2(4)=23.5^{**}$             | $\chi^2(4)=26.3^{**}$                     |
| <b>Employment Status</b>                |                                         |                                                                |                                             |                                   |                                           |
| Work full time                          | 50 (26.2)                               | 62 (53.9)                                                      | 74 (58.3)                                   | 74 (52.1)                         | 44 (50.0)                                 |
| Work part time                          | 53 (40.5)                               | 41 (55.4)                                                      | 66 (67.3)                                   | 53 (55.8)                         | 37 (60.7)                                 |
| Student or unemployed                   | 5 (41.7)                                | 1 (11.1)                                                       | 3 (30.0)                                    | 1 (20.0)                          | 1 (33.3)                                  |
| Retired                                 | 224 (46.8)                              | 198 (63.3)                                                     | 289 (75.1)                                  | 297 (69.1)                        | 173 (75.5)                                |
| Don't work due to illness or disability | 21 (23.3)                               | 25 (41.0)                                                      | 48 (59.3)                                   | 42 (51.9)                         | 23 (50.0)                                 |
|                                         | $\chi^2(4)=34.7^{**}$                   | $\chi^2(4)=19.7^{**}$                                          | $\chi^2(4)=24^{**}$                         | $\chi^2(4)=23.9^{**}$             | $\chi^2(4)=26.3^{**}$                     |
| <b>Tumour Group</b>                     |                                         |                                                                |                                             |                                   |                                           |
| Lung                                    | 24 (46.2)                               | 20 (64.5)                                                      | 31 (83.8)                                   | 40 (85.1)                         | 15 (88.2)                                 |
| Prostate                                | 41 (48.8)                               | 42 (55.3)                                                      | 61 (83.6)                                   | 37 (58.7)                         | 30 (73.2)                                 |
| Upper Gastrointestinal                  | 16 (40.0)                               | 23 (76.7)                                                      | 21 (63.6)                                   | 22 (68.8)                         | 5 (50.0)                                  |
| Colorectal/Lower Gastrointestinal       | 70 (46.1)                               | 61 (69.3)                                                      | 90 (75.0)                                   | 91 (62.8)                         | 35 (63.6)                                 |



|                       |                     |                      |                      |                     |                        |
|-----------------------|---------------------|----------------------|----------------------|---------------------|------------------------|
| Breast                | 100 (41.7)          | 74 (46.8)            | 112 (55.7)           | 111 (55.0)          | 65 (54.6)              |
| Haematological        | 22 (29.7)           | 24 (70.6)            | 40 (72.7)            | 31 (75.6)           | 46 (82.1)              |
| Head and Neck         | 17 (29.8)           | 25 (56.8)            | 36 (83.7)            | 31 (66.0)           | 12 (52.2)              |
| Gynaecological        | 28 (31.8)           | 24 (58.5)            | 39 (68.4)            | 47 (61.0)           | 34 (79.1)              |
| Brain/CNS/<br>Sarcoma | 7 (33.3)            | 8 (66.7)             | 11 (68.8)            | 8 (50.0)            | 6 (66.7)               |
| Skin                  | 11 (36.7)           | 6 (40.0)             | 11 (91.7)            | 9 (64.3)            | 11 (61.1)              |
| Urological            | 16 (27.6)           | 19 (47.5)            | 25 (58.1)            | 34 (60.7)           | 18 (62.1)              |
|                       | $\chi^2(10)=18.5^*$ | $\chi^2(10)=24^{**}$ | $\chi^2(10)=40^{**}$ | $\chi^2(10)=20.5^*$ | $\chi^2(10)=24.9^{**}$ |

\*p<0.05, \*\*p<0.01

# BMJ Open

## Qualitative Analysis of 6961 free-text comments from the first National Cancer Patient Experience Survey in Scotland

|                                 |                                                                                                                               |
|---------------------------------|-------------------------------------------------------------------------------------------------------------------------------|
| Journal:                        | <i>BMJ Open</i>                                                                                                               |
| Manuscript ID                   | bmjopen-2016-015726.R1                                                                                                        |
| Article Type:                   | Research                                                                                                                      |
| Date Submitted by the Author:   | 27-Feb-2017                                                                                                                   |
| Complete List of Authors:       | Cunningham, Margaret; University of Stirling, NMAHP Research Unit<br>Wells, Mary; University of Stirling, NMAHP Research Unit |
| <b>Primary Subject Heading</b>: | Patient-centred medicine                                                                                                      |
| Secondary Subject Heading:      | Oncology, Qualitative research                                                                                                |
| Keywords:                       | patient experience, free text, national survey, Scotland, cancer                                                              |
|                                 |                                                                                                                               |

SCHOLARONE™  
Manuscripts

Peer Review Only

1  
2  
3  
4 Qualitative Analysis of 6961 free-text comments from the first  
5 National Cancer Patient Experience Survey in Scotland  
6  
7

8  
9 Dr Maggie Cunningham<sup>1</sup>, Prof Mary Wells<sup>1</sup>

10  
11 <sup>1</sup> NMAHP Research Unit, University of Stirling, Stirling, UK.  
12

13  
14 Word count =  
15

16  
17  
18 Corresponding author:  
19

20 Prof Mary Wells, NMAHP Research Unit, University of Stirling, Stirling, FK9 4LA

21  
22 Email: [mary.wells@stir.ac.uk](mailto:mary.wells@stir.ac.uk)  
23

24  
25 Phone: 01786 466118  
26  
27  
28  
29  
30  
31  
32  
33  
34  
35  
36  
37  
38  
39  
40  
41  
42  
43  
44  
45  
46  
47  
48  
49  
50  
51  
52  
53  
54  
55  
56  
57  
58  
59  
60

## Abstract

### Objectives

To analyse free-text responses from the first Scottish Cancer Patient Experience Survey to understand patients' experiences of care, identify valued aspects and areas for improvement.

### Design

Inductive thematic analysis of seven free-text comment boxes covering all stages of the cancer experience, from a national cohort survey.

### Setting and participants

Adult cancer patients diagnosed across all Health Boards in Scotland between July 2013 and March 2014, and who had an inpatient stay or hospital visit between January and September 2014. 2663 respondents (of n=4835 survey respondents) provided 6961 free-text comments.

### Main outcome measures

Positive and negative themes of patients' experiences. Differences in the proportion of positive to negative comments by demographics.

### Methods

Data were analysed as follows: (i) comments were initially categorised at a high level (eg positive, negative, miscellaneous etc); (ii) inductive codes were derived and applied to all relevant comments; (iii) codes sharing similar meaning were amalgamated into sub-themes, and code frequencies were measured; (iv) subthemes were mapped into overarching themes; (v) difference in the proportion of positive to negative comments by demographic were analysed using chi-squared tests.

### Results

Participants made more positive than negative comments (1:0.78). Analysis highlighted the importance to patients of *Feeling that Individual Needs Are Met* and *Feeling Confident Within the System*. Comments also provided insight into how *Processes* and *Structures* within the system of care can negatively impact on patients' experience. Particular issues were identified with care experiences in the lead up to diagnosis.

### Conclusions

This analysis provides a detailed understanding of patients' cancer care experiences, therefore indicating what aspects matter in those experiences. Although the majority of comments were positive, there were a significant number of negative comments, especially about the lead up to diagnosis. Comments suggest patients would value greater integration of care from services involved in their treatment for cancer.

Abstract word count = 300

### Strengths and limitations of this study

- Large dataset from a National survey
- Use of seven free-text comment boxes gives patients a chance to comment on all aspects of the cancer patient experience.
- Analysis by each comment box gave clear indication of stages of care which are of specific concern.
- Analysis across the whole dataset identified themes about their cancer care which are of particular importance to patients.

- Free-text responses to surveys may not be representative of all patients' experiences.

## Funding

This work was funded by the Scottish Government and Macmillan Cancer Support.

## Competing interests

None declared.

## Authors' contributions

Both authors have made substantial contributions to this work, participated in writing and revising the paper, and approved the final submission. Both authors have agreed to be accountable for all aspects of the work. MC led on analysis of the data, developing the coding framework and writing the paper. MW contributed to the development of the coding framework and the writing process, and led on identification of the themes.

## Data sharing statement

The data for the study are the free-text responses to the 2015-16 Scottish Cancer Patient Experience Survey. The data is available on application and subject to appropriate approvals, from the Scottish Government Information Services Division. The data was provided by the Scottish Government Analytical Services Division, following agreement from the Public Benefits and Privacy Panel.

## Acknowledgements

The authors wish to thank the patients who took the time to leave free-text comments in the survey. We would also like to acknowledge the work of the Scottish Cancer Patient Experience Survey Steering Group in guiding the design of the survey tool. We would like to thank Andrew Paterson and Emma Milburn, Scottish Government and Kelly Shiell-Davis and Hanna Hine, Macmillan Cancer Support, for their help and support critically commenting on the survey report; and Patricia Aitchison, Research Fellow, NMAHP RU, University of Stirling, for her work in double coding. The views are those of the authors and do not necessarily represent the views of Macmillan Cancer Support and the Scottish Government.

## Introduction

Finding ways to deliver high quality, person-centred care is central to NHS policy, and has been driven by rising demands, financial pressures, concerns about standards of care and a greater focus on the 'consumer's' perspective.[1] Patient experience is recognised as one of the critical elements of high quality health care, along with clinical effectiveness and safety.[2] Not just important in itself, patient experience has been shown to be positively associated with a range of health, resource use and safety outcomes.[3] In NHS England, a measure of patient experience is included as one of four key metrics contributing to each Clinical Commissioning Group's overall rating for cancer care.[4] Assessing the patient's perspective provides valuable insights into how the whole healthcare system impacts upon the patient's experience across the care continuum, rather than looking at individual services in isolation from a clinical or hospital management standpoint.[5]

Cancer remains a leading cause of death worldwide and will affect one in two people in the UK during their lifetime.[6] For many patients, being diagnosed and treated for cancer is a long and complicated process, involving multiple stages of investigation and treatment, and multiple encounters with a variety of health professionals and services. Several surveys have been conducted by researchers to gain a better understanding of cancer patients' experience of care, although the majority of these look at particular aspects of the care trajectory e.g. follow-up care,[7] hospital care;[8] or at specific types of cancer e.g. breast,[9] lung and colorectal.[10]

National Cancer Patient Experience Surveys have been carried out every 18-20 months in England since 2010,[11] and also in Norway,[12] Northern Ireland,[13] and Wales.[14] This is the first time such a survey has been conducted in Scotland. The quantitative results of the SCPES were published in June 2016, highlighting that the majority of patients have a positive experience of care overall, and that many aspects of care provision are working well.[15] However, the results also draw attention to particular areas of care which are less positive and require service improvement.[15]

Previous research has found that clinical staff find quantitative data of limited use in designing service improvements as they do not provide a sufficiently detailed description of the issues which matter to patients.[16] Including free-text comments in experience surveys has the potential to overcome this problem, giving the patient a voice to influence service improvement.[17] Data from free-text comments can give patients the opportunity to explain their experiences in more detail, providing deeper insights into patients' experiences, in particular providing an opportunity for patients to be critical of specific aspects of their care.[17] Previous UK National surveys have included three brief opportunities for free-text, asking 'was there anything particularly good about your NHS cancer care?', 'was there anything that could have been improved?', and 'any other comments?' at the end of the survey.[18] The SCPES steering group made a decision to include a free-text question at the end of each section of the survey, providing an opportunity for patients to write about different aspects of their cancer care in more detail.

The present paper reports on the thematic analysis of all free-text comments provided by participants in the 2015-16 SCPES. The purpose of the analysis was to understand the full breadth of cancer patients' experiences of care in their own words, and from this to identify the aspects of the cancer care experience which participants particularly valued, and also to explore themes which highlight areas for improvement in cancer services.

## Methods

### Study design

Data gathering for the Scottish Cancer Patient Experience Survey (SCPES) took place between 7<sup>th</sup> October 2015 and 22<sup>nd</sup> January 2016. Jointly funded by the Scottish Government and Macmillan Cancer Support, the survey was posted to all NHS Scotland patients who met the following inclusion criteria: -

- Diagnosed with any cancer between July 2013 and March 2014
- Had an inpatient stay or hospital visit as a day case between 1<sup>st</sup> January and 30<sup>th</sup> September 2014

In total, 7,949 survey packs were sent. Two reminder letters were sent to non-responders after 3 and 6 weeks. Patients could respond to the survey via freepost return, or by completing the survey online.

### Survey

The survey questionnaire was based on the equivalent English National Cancer Patient Experience Survey,[18] with 69 questions covering referral to hospital by GP, diagnosis, decisions about treatment, role of the clinical nurse specialist, support for people with cancer, hospital doctors and ward nurses, hospital care and treatment, radiotherapy and chemotherapy, home care and support, care from general practice and overall NHS care. In addition, seven free-text comment boxes were included throughout the questionnaire asking participants if there was anything else they would like to add about their experiences in relation to seven areas of care (Table 1). Demographic and clinical information were collected including gender, age, socio-economic status, ethnicity, sexual orientation, employment status and tumour group. Anonymised data were transferred from Scottish Government to the researchers, using encrypted software.

### Governance

The approvals process for the survey was led by the Information Services Division (ISD). Approval for analysis of the fully anonymised comments by the research team was given by the Public Benefits and Privacy Panel [www.informationgovernance.scot.nhs.uk/](http://www.informationgovernance.scot.nhs.uk/).

### Analysis

#### Qualitative Analysis

Free-text comments were analysed using thematic analysis,[19] employing an inductive approach – coding and theme development were driven by the content of the comments. Analysis of the large data-set was carried out using a structured approach.[20] The data were divided into responses for each of the comment boxes, creating seven data-sets. These data-sets were initially analysed separately, before being considered as a whole during the creation of themes. One researcher (MC) familiarised herself with the data for each comment box by reading all of the responses. Notes were made of any potential codes for each individual data-set by identifying recurring words or units of meaning. A second researcher (MW) familiarised herself with a random sample of the responses and the two researchers discussed and agreed coding decisions. In order to further structure the data, responses were sorted into first order codes based on whether the comment was (i) positive; (ii) negative; (iii) entirely factual/neutral, for example ‘no treatment required after operation’; (iv) entirely irrelevant/miscellaneous, for example ‘operation at (hospital name removed)’; (v) contained both positive and negative comments. If a comment contained for example, both positive and

1  
2  
3 neutral content, it would be coded as a positive comment. Comments which were entirely  
4 factual/neutral or irrelevant/miscellaneous were not included in further analysis. MC then applied  
5 second order codes to all remaining comments in each individual data-set. Because the second order  
6 codes had been derived inductively from the data, the coding sheet was different for each of the  
7 seven data-sets. In total, there were 174 second order codes across the seven comment boxes.  
8 Comments were given as many codes as were appropriate to cover the content of the comment, for  
9 example the comment 'Food and ward hygiene were disgusting' was given the first order code  
10 'negative' and the second order codes 'bad food' and 'hygiene issues'. Comments were then  
11 grouped by second order code and re-read and compared in order to check for consistency of  
12 meaning within the code. During this process of constant comparison, codes were amalgamated, or  
13 new codes were created as differences in meaning were identified. A third researcher (PA) checked  
14 first and second order coding decisions for a random 5% of the comments. Any discrepancies or  
15 disagreements (of which there were only a small number) were discussed by the team, and  
16 adjustments made if necessary. Two researchers (MC and MW) worked together to compare,  
17 contrast and consolidate codes by identifying similar codes and discussing differences across the  
18 seven comment boxes. Many codes that were identified in particular comment boxes also emerged  
19 in other comment boxes, indicating that there were recurring issues that were relevant to all aspects  
20 of the cancer experience. Therefore, codes which shared similar meaning were amalgamated into  
21 sub-themes. For example, the codes 'hygiene issues', 'uncomfortable environment', 'unhygienic,  
22 noisy, bad food', 'uncomfortable environment', 'bad food', 'too noisy', 'poor facilities', 'bad food,  
23 food not as recommended', 'poor facilities/uncomfortable' and 'problems with ward environment',  
24 which emerged across the comment boxes, were amalgamated into the sub-theme 'unsuitable or  
25 uncomfortable environment'. The sub-themes were therefore relevant to all aspects of the  
26 patients' experience of care. Code frequencies were measured to give an indication of the  
27 prominence of different sub-themes. Sub-themes were then mapped by MW and MC into  
28 overarching themes which encompassed and described the main issues highlighted in the data.  
29 Several sub-themes were related to patients' perceptions of the way care was organised, and the  
30 other sub-themes were related to how patients actually experienced their care.

31  
32  
33  
34  
35  
36 Sub-themes are illustrated with quotes in Tables 4 and 5. In order to preserve context, comments  
37 have been presented in full. This may mean in some cases that quotes represent more sub-themes  
38 than the one they are presented next to in the table. An individual respondent could contribute to  
39 more than one sub-theme if their free-text comment covered several issues. The number of  
40 comments reported in the tables are the number of comments which included information for each  
41 sub-theme.  
42  
43

### 44 Quantitative Analysis

45 First order positive and negative coding for each of the comments were analysed by key  
46 demographics – gender, age, socioeconomic status, employment status, tumour group and health  
47 board - using chi-squared tests. The proportion of participants who made a positive comment was  
48 compared to the proportion who made a negative comment across each demographic category, for  
49 each of the comment boxes. Standardised adjusted residuals were calculated for each of the cells of  
50 data in order to identify which differences between observed and expected cell counts contributed  
51 to statistically significant chi square results. Standardised adjusted residuals of  $\geq 1.96$  indicate there is  
52 a statistically significant difference between the number of cases observed in that cell, and the  
53 number expected if the null hypothesis is true i.e. that the demographic has no bearing on the  
54 proportion of positive and negative comments.  
55  
56  
57  
58  
59  
60



1  
2  
3 Participants who made comments which were both positive and negative, or who made  
4 factual/neutral or irrelevant/miscellaneous comments were excluded from this analysis. Chi-squared  
5 tests were not performed for ethnicity and sexual orientation due to the low number of respondents  
6 for these demographics.  
7

8 Due to the low number of respondents in certain categories, brain, central nervous system and  
9 sarcoma cancer types were merged, as were the age bands 16-25 years and 26-35 years. Comments  
10 from three rural health boards (NHS Orkney, NHS Shetland, and NHS Western Isles) were omitted  
11 due to having less than 5 respondents who made at least one free-text comment.  
12  
13  
14  
15  
16  
17  
18  
19  
20  
21  
22  
23  
24  
25  
26  
27  
28  
29  
30  
31  
32  
33  
34  
35  
36  
37  
38  
39  
40  
41  
42  
43  
44  
45  
46  
47  
48  
49  
50  
51  
52  
53  
54  
55  
56  
57  
58  
59  
60

## Findings

4,835 patients completed the survey, a 61% response rate. Of those patients, 2,663 (55%) left at least one free-text comment. There were differences in clinical or sociodemographic characteristics between those respondents who left at least one comment, and those respondents to the survey who left no comment (Table 2). Women, respondents aged 35-44 and 45-54 years and part-time workers were more likely to leave a comment and respondents aged 76 and over, those who were retired, those from the most deprived areas, and respondents with prostate cancer or cancer from an unknown tumour group were less likely to leave a comment. In total 6,961 comments were made by respondents. Overall, more positive (2,528) than negative (1,969) comments were made, a ratio of 1:0.78 (Table 3). Positive comments (average 24 words) tended to be shorter, more generic and less detailed than negative comments (average 43 words). Respondents made more positive than negative comments for all comment boxes except Comment Box 1 (the lead up to diagnosis), where a significantly greater number of negative comments were made (571 negative, 369 positive,  $\chi^2(6)=200.6$ ,  $p<0.001$ ).

## Qualitative Findings

### Positive comments

Themes emerging from the positive comments are illustrated with quotes in Table 4. The majority of these comments reflected a generally positive experience, with respondents describing their care as good, very good or excellent. Many of these positive comments lacked any detail as to which aspects of the experience were particularly valued by patients.

Where respondents did give more detail about the aspects of care which gave them a positive experience, the most common theme was *Good Support*. Within this theme, respondents described being cared for both practically and emotionally, and being treated as an individual. Comments about *Good Support* related to care received from NHS staff, in particular from clinical nurse specialists and GPs, and also to support received through a range of charities. However, many participants commented that they had found out about the support available from charities through word of mouth e.g. from other patients rather than having been signposted by NHS staff.

Another common positive theme was *Information*, with participants describing how much they valued receiving clear information and thorough explanations of their cancer and treatment, including treatment options. The manner in which information was conveyed was also important, with participants appreciating sensitive communication from staff who gave them the time to process information and ask questions.

Further positive comments related to receiving *Good Clinical Care*. Respondents commented on treatment going well, good symptom management, and having faith in the clinical competence of staff. Participants expressed their confidence when they felt that they were being treated by a cohesive team, appreciating communication and continuity of care. Many participants were relieved and grateful that their GP had identified symptoms and organised diagnostic testing for cancer.

Respondents commented positively on *Efficient Processes*, mainly in relation to the speed of treatment, both in referral for tests before diagnosis, and in the efficient running of outpatient clinics. The smooth running and speed of various national screening programmes was also commented on favourably.

The final distinct positive theme suggested by the data was *Trust In The System*, with respondents particularly valuing knowledgeable staff, and a collaborative and inclusive approach to decision making about treatment.

## Negative comments

Four broad themes emerged from analysis of the negative comments in the survey as depicted in Figure 1. A number of sub-themes were identified within these four overarching themes, and these are illustrated by selected quotes in Table 4. The sub-themes clearly suggested that negative experiences were related to (i) Patients not feeling confident or secure within the system, or (ii) Patients not feeling that their individual needs were met. Other sub-themes related to participants' perceptions of the way care was organised and these grouped into (iii) the way services and environments are set up (which we termed *Structures*), and (iv) the organisation of care and treatment (which we termed *Processes*).

### *Insert Figure 1 Negative Aspects of Care*

Although there were not as many negative comments as there were positive, the negative comments were much more specific and detailed, and gave a very clear picture of where improvement strategies could focus in order to enhance patients' experiences of cancer care.

The theme with the most negative comments, '*Not feeling confident or secure within the system*', represented a number of sub-themes (Table 5). The most common sub-theme was generated from comments about receiving *poor care*, particularly inadequate symptom management. Comments suggested that care was perceived to be poorer at night and at weekends, as well as on general rather than specialist wards. Many respondents described deficiencies in care and support *after treatment* had ended, including not receiving sufficient contact or emotional support and feeling isolated and alone; not being sure who to contact when they had cancer or treatment related problems; not receiving enough help with management of side-effects; and feeling that they received inadequate information about ongoing monitoring. A concern for some respondents was the lack of contact or support they received from their GP practice, community nurse or district nurse. Concerns about the role of primary care in the cancer experience were also reflected in comments about *difficulties getting into the system*. The majority of comments in this sub-theme described the delays and multiple visits to GPs experienced by some participants before they were referred for diagnostic tests. However, other issues with the lead up to diagnosis were not with primary care, but with participant's understanding of diagnostic testing, reflected in comments about *lack of faith in the system*. Some participants described their confusion that diagnostic tests or screening had not identified cancer. Many respondents also lost confidence in the system when they were given *inconsistent or incorrect information* by different health professionals involved in their care. Others described a feeling of being in limbo because of waits and delays between one stage of treatment and the next, and a lack of communication during these uncertain and difficult times.

The second core theme which emerged was '*Not feeling that individual needs were met*'. Within this theme the greatest number of comments related to information not being sufficient or specific enough to meet patients' individual needs. Some patients were clearly overwhelmed by the amount of information they received, but most expressed a wish that they had been given more detailed and honest information about treatment options, side effects and self-management, as well as about other services they could access for specific support and information e.g. on financial issues. Many participants gave examples of poor communication during their experience of being treated for cancer, illustrating incidents where members of staff were perceived as insensitive, rude or dismissive. Other communication problems related to the way some patients had been told they had cancer, with many feeling that the conversation was vague, rushed or not handled sensitively. Lack of emotional support was also mentioned by many respondents, particularly if they did not have

1  
2  
3 access or were not referred to a clinical nurse specialist or Macmillan service. Some felt they had  
4 not been listened to, or they experienced a lack of continuity in support (e.g. when staff changed,  
5 went on holiday or were not available). Many participants expressed feelings of isolation and  
6 loneliness, both during and particularly after treatment, because they did not receive the support  
7 they needed.  
8

9  
10 The negative impact of *Structures* and *Processes* on experiences of cancer care was expressed  
11 through a considerable number of comments related to the way in which services were set up and  
12 organised. The most common issue under the theme of *Processes* (the organisation of care and  
13 treatment) was waits and delays, covering waiting for appointments to be scheduled, waiting  
14 between one thing and the next thing happening, and waiting on the day of appointments. Many  
15 patients specifically mentioned waiting on the day of chemotherapy appointments, with some  
16 describing waits of several hours before their chemotherapy commenced. Other unsatisfactory  
17 processes related to experiences of ineffective and unreliable communication systems. Many  
18 participants described inefficient administrative procedures, including delays in letters being  
19 received by or sent to GPs; appointments not being arranged; and appointments being cancelled or  
20 postponed without adequate communication. One of the most common sources of concern was that  
21 monitoring and follow-up appointments were not always arranged in line with the expectations that  
22 had been set by clinicians, leaving considerable room for uncertainty and worry. Other experiences  
23 included notes going missing, problems with call handling, poor communication between  
24 departments, and different sites not having access to full notes, all contributing to participants  
25 feeling passed around or feeling that their care was fragmented.  
26  
27

28  
29 Participants also described a number of ways in which aspects of the care environment impacted  
30 negatively on their experiences. Particular issues highlighted under the theme of *Structures* were  
31 related to lack of privacy, bed availability or aspects of comfort on wards (e.g. meals, bathrooms)  
32 difficulties with transport and inadequate staffing levels.  
33

### 34 Quantitative Analysis

35 Differences in the proportion of positive to negative comments by demographics (gender, age,  
36 socioeconomic status, employment status, tumour group and health board) were analysed using chi-  
37 squared tests for each of the seven comment boxes. The proportion of positive comments within  
38 each sub-category for age, employment status and tumour group is presented in Table 6.  
39

40  
41 There were significant differences in the experience of cancer care by age and employment status  
42 across the first five comment boxes (Table 6). Younger participants were less likely to report a  
43 positive experience compared to participants over age 66, across all comment boxes except  
44 Comment Box 6 (chemotherapy/radiotherapy). A greater proportion of participants who worked full  
45 time, or who didn't work because they were either unemployed, a student, or had an illness or  
46 disability, were negative about their experiences of cancer care across the first five comment boxes,  
47 whereas a greater than expected proportion of participants who were retired were positive about  
48 their experiences of cancer care.  
49

50  
51 There were significant differences in particular aspects of the experience of cancer care by tumour  
52 group (Table 6). The proportion of positive to negative comments made in response to each  
53 comment box was compared for each of the cancer groups. There was a trend for participants with  
54 less common cancer types (e.g. haematological, head and neck, gynaecological, brain, CNS, sarcoma  
55 and urological cancers) to make proportionately more negative comments about their experience of  
56 the lead up to diagnosis (Comment Box 1). There was a trend for respondents with breast and  
57 urological cancers to report a proportionately greater number of negative experiences about their  
58  
59  
60

1  
2  
3 involvement in decision making, the support they received and inpatient care (Comment Boxes 2, 3,  
4 4). Participants with lung cancer tended to make a greater proportion of positive comments about  
5 their experiences of support received, inpatient and outpatient care. Finally, participants with upper  
6 gastrointestinal and head and neck cancers made a greater proportion of negative comments about  
7 their experience of day patient/outpatient care (Comment Box 5).  
8

9  
10 There were significant gender differences in the proportion of positive to negative comments for the  
11 way decisions were made about treatment (male, n=164 (66.9%) positive; female, n=169 (49.3%)  
12 positive;  $\chi^2(1)=18.2$ ,  $p\leq 0.001$ ), and participants' experience of the support they received (male,  
13 n=213 (79.5%) positive; female, n=272 (61.0%) positive;  $\chi^2(1)=26.3$ ,  $p\leq 0.001$ ), with men being more  
14 likely than women to report a positive experience. This gender difference is significant in both  
15 participants with and without breast cancer, indicating it is not merely a breast cancer effect. There  
16 were no significant gender differences across any of the other Comment Boxes.  
17

18  
19 The only significant difference in the proportion of positive to negative comments by socioeconomic  
20 status was for inpatient care (Comment Box 4), where the least deprived participants made a greater  
21 proportion (46.6%) of negative comments about their experience than participants from any of the  
22 other groups (34.8%, 28.2%, 33.1%, 38.9% for Scottish Index of Multiple Deprivation groups 1-4  
23 respectively) ( $\chi^2(4)=13.3$ ,  $p=0.10$ ).[21]  
24

25  
26 There were no significant differences in the proportion of positive to negative comments across any  
27 of the demographics for comment box 6 (chemotherapy/radiotherapy treatment) or comment box 7  
28 (anything else about the experience of cancer care), except for an age effect in comment box 7 (with  
29 a greater proportion of negative comments in younger people, 16-35, n=6 (31.6%) positive; 36-50,  
30 n=36 (40.9%) positive; 51-65, n=126 (45.3%) positive; 66-75, n=116 (55%) positive; 76 and over, n=63  
31 (63%) positive;  $\chi^2(4)=16.8$ ,  $p=0.002$ ).  
32

33  
34 There were no significant differences in the proportion of positive to negative comments across any  
35 of the Comment Boxes by health board.  
36

## 37 Discussion

38 This is the first time that a nationwide survey has been conducted of Scottish cancer patients'  
39 experience of their care. Providing seven free-text comment boxes gave participants the opportunity  
40 to expand on particular aspects of their care which were important to them or had an impact on  
41 their overall experience. The analysis of the comments revealed that the ratio of positive to negative  
42 comments was 1:0.78, indicating that while the majority of patients had a positive experience of  
43 care, a significant minority had a negative experience, and this was particularly the case in the lead-  
44 up to diagnosis. Previous analysis of the closed-ended questions from the survey found that 94% of  
45 respondents rated their overall experience of care as good or very good.[15] Analysis of the free-text  
46 comments provided a much greater insight into the specific problems participants had encountered  
47 during their cancer care. The generic nature of positive comments meant that there was less  
48 detailed analysis of the aspects of care which patients value. However, good support, clear  
49 information, good clinical care and efficient processes all emerged as positive themes for  
50 participants. Negative comments tended to be more detailed and specific and therefore provided  
51 richer material for analysis. Four themes emerged from the negative comments, highlighting the  
52 importance, to people with cancer, of feeling confident in the system and being treated as an  
53 individual. Analysis of the negative comments revealed that many participants had experienced  
54 problems with the way care was organised and services were set up.  
55  
56  
57  
58  
59  
60

1  
2  
3 Although nothing emerged from the inductive thematic analysis about differences in experience of  
4 care as a results of sociodemographic characteristics, analysis of the positive and negative comments  
5 indicated that participants who were younger, who worked full time, or who had certain types of  
6 cancer were more likely to report negative experiences. The demographic trends identified in this  
7 analysis were similar to the (English) National Cancer Patient Experience Survey 2011-12 which  
8 found that female and younger patients are less likely to be positive about their cancer  
9 experience.[22] Both the qualitative and quantitative results of the SCPES found that patients from  
10 the least deprived areas were more negative about their experience of inpatient care.[15] Variations  
11 in the experience of care between demographic groups could represent differences in needs,  
12 expectations or the provision of care.[22] While the analysis indicates that certain types of patients  
13 have a more negative experience of care, a cross-sectional survey cannot provide an explanation for  
14 differences by demographics, and further research is required to unpick why certain patient  
15 characteristics are associated with reporting more negative experiences of care.  
16  
17

18  
19 A strength of this study was the structured approach followed to analyse the large data-set.[20]  
20 However, the qualitative researcher is part of the analysis process, and makes subjective decisions  
21 about coding and the creation of sub-themes and themes. While the analysis was conducted by a  
22 team of independent researchers and the process followed was transparent and rigorous, there will  
23 always be an element of subjectivity to qualitative analysis. The free-text comments formed part of a  
24 larger survey which also included closed-ended questions about patient experience. A limitation of  
25 this analysis is that data access issues meant we were not able to compare the quantitative and  
26 qualitative data. A further limitation was that no information was gathered about the health status  
27 of participants. Sending surveys to an entire cohort of patients maximised the opportunities to  
28 capture a wide range of experiences, and including seven free-text comment boxes placed  
29 throughout the survey gave participants the opportunity to reflect and comment on different stages  
30 of the cancer journey. The free-text questions focused on experiences of, rather than satisfaction  
31 with, care, removing the risks inherent in making assumptions about how patients evaluate  
32 satisfaction.[23] However, there is a risk of bias in free-text responses towards patients who are  
33 more literate, have English as a first language, and who do not have learning difficulties. We found  
34 significant differences between participants who left a free-text comment and those who did not,  
35 with women, part-time and middle-aged respondents leaving a greater proportion of comments  
36 than expected, and respondents from the most deprived areas and those with prostate cancer  
37 leaving fewer comments than expected. Highlighting the importance of gathering patients' views on  
38 their health care may reduce intimidation and improve response rates from hard to reach patient  
39 groups.[24]  
40  
41  
42  
43

44 Although most of the issues within the subthemes were covered at some point in the closed-ended  
45 questions in the survey, participants often brought up issues, unprompted, in the qualitative  
46 comments before they had arisen in the questionnaire. For example, although the first three  
47 comments boxes and their preceding quantitative questions didn't ask specific questions about  
48 continuity of care, or being treated as an individual, both came out strongly in participants'  
49 comments. The content of the comments boxes also reflected specific issues covered in the  
50 preceding closed-ended questions. However, within the comments, participants gave much more  
51 depth and description about the issues.  
52  
53

54 The SCPES was based on a survey which has been previously conducted in England and Wales, which  
55 asked participants what was particularly good, and what could have been improved about their  
56 cancer experience.[18] Analysis of the free-text comments of London participants,[25] and Welsh  
57 participants,[14] revealed a greater proportion of positive to negative comments (1:0.51 London;  
58  
59  
60

1  
2  
3 1:0.61 Wales) than in the SCPES (1:0.78). This effect may be because the SCPES did not specifically  
4 ask patients to describe what they found good about their care. There were many similarities in the  
5 themes identified in all three surveys, including that patients commented on receiving poorer care at  
6 nights and at the weekend; and on issues with the role of primary care in cancer diagnosis. Many  
7 participants in the SCPES noted poorer care when receiving care from staff who they perceived not  
8 to be cancer specialists. Analysis of English survey results indicated that patients in Trusts which had  
9 more cancer specialist nurses, reported a better experience of care coordination and emotional  
10 support.[26] The issues around lack of involvement and choice in decision making, being given  
11 inconsistent or inappropriate information, and lack of signposting to support services, which were  
12 highlighted in the SCPES, did not appear to emerge strongly in the free-text analysis of other surveys.  
13 It is not clear whether this is an effect of the difference in free-text questions and analysis between  
14 the surveys or if it reflects actual differences in the experience of cancer patients between these  
15 countries. Nonetheless, communication emerged as a theme in all three surveys, both within health  
16 services and between health professionals and patients. Designing interventions to improve  
17 communication is a critical challenge in improving the delivery of cancer care.[27-28]

21 Two major aims of the current Scottish Government's Cancer Strategy are to improve cancer  
22 detection and aftercare.[29] Our analysis suggests that many patients have significant problems with  
23 these two phases of care at present. There have been guidelines for the referral of suspected cancer  
24 cases in Scotland since 2002,[30] which have been revised in light of new research in 2007 and  
25 2014;[31] NICE also published suspected cancer referral guidelines in 2015.[32] The Scottish  
26 Government launched the Detect Cancer Early Programme in 2012, developing projects with the  
27 NHS to increase screening uptake, increase diagnostic capacity, and work with GPs to promote  
28 referral or investigation for suspected cancer cases.[33] Free-text comments in the SCPES suggest  
29 that patients were less happy with the lead up to diagnosis than at any other point in their  
30 treatment. Some made positive comments about the efficiency of national screening programmes,  
31 however, the majority of respondents were negative about the lead up to diagnosis, particularly  
32 commenting on experiencing long waits and delays, having difficulty getting into the system, and  
33 poor communication. The timing of the SCPES may be a factor in people having a less good  
34 experience of the lead up to diagnosis, with participants for the survey having received a diagnosis  
35 between July 2013 and March 2014. It is possible the Detect Cancer Early Programme had not yet  
36 had an impact on processes around diagnosis for the cohort in this study. However, we found that  
37 patients with less common cancer types made a greater proportion of negative comments about the  
38 lead up to diagnosis. The Detect Cancer Early Programme has focused on breast, colorectal and lung  
39 cancers, as they are the most common cancers in Scotland;[34] our results suggest that patients with  
40 less common cancers are not benefiting from similar improvements to the early diagnosis system.  
41 Further, referral guidelines, and improvements in the capacity of screening and diagnostic services  
42 are aimed at tackling processes, rather than the patients' experiences of those processes. One of the  
43 main problems with the lead up to diagnosis identified in this study was around poor communication  
44 at the time of diagnosis, with participants describing feeling that staff did not listen to them, or that  
45 they were not given information appropriate to their needs at that time. Many participants  
46 described feeling confused and anxious as a result of the way they were told about their diagnosis,  
47 and others experienced delays and confusion around diagnostic testing and once they got into the  
48 hospital system. Results from the SCPES suggest that improving diagnostic pathways for less  
49 common cancers, and improving communication at the time of diagnosis would enhance the  
50 experience of this particularly worrying and stressful time. These results chime with those of another  
51 recently published analysis of free-text comments, which illustrates that patients may move  
52  
53  
54  
55  
56  
57  
58  
59  
60

1  
2  
3 backwards and forwards within the diagnostic pathway and that this is often complex and difficult to  
4 navigate.[35]

5  
6 The relatively large proportion of negative comments indicate that not all cancer patients in Scotland  
7 are receiving person-centred care. From the patient's perspective, all stages of the care continuum  
8 and every interaction with services have an impact on their experience. This survey identified  
9 problems with both interactions with health professionals and services and linkages between  
10 services. Participants described interacting with many different services, including GPs, charities,  
11 cancer services and other specialist services – coordination of care between these services arose as  
12 an issue in multiple free-text comments, suggesting problems with fragmentation of care, lack of  
13 signposting, inconsistent information, and the patient not knowing who to contact. Understanding  
14 and improving processes for administration, communication and coordination between services is  
15 vital to ensure a positive and high quality experience for the patient.[27] While improvement at an  
16 individual service level is important to enhance clinical effectiveness and safety, improvement  
17 efforts also need to take a 'whole systems' view in order to impact on the overall patient experience.  
18 A recent review of the relationship between integrated care and cancer patient experience found a  
19 positive association between greater integration of care and both patient experience, and  
20 professionals' behaviour and attitudes in cancer care, identifying the importance of (i) having a case  
21 manager or navigator, (ii) the engagement of a multidisciplinary team in care and treatment, and (iii)  
22 a continuous relationship between the case manager and healthcare professionals.[36] The results  
23 of the SCPES identified that participants were particularly positive about their experience when they  
24 felt they received treatment from a cohesive team, and negative about their experience when they  
25 felt they did not have a named contact who was available to help them with aspects of their care  
26 and provide information in a responsive and meaningful way.

27  
28 The SCPES provides detailed information about the experience of cancer care at a system level in  
29 Scotland. However, a survey of this nature is anonymous and there is a time lag between the  
30 experience of care and analysis, meaning the results have no direct impact for individual  
31 participants. Also, due to the distributed care of patients with cancer, it can be difficult to identify  
32 particular parts of the service which would benefit from organisational change. The measurement of  
33 patient experience should be timely and focused in order to provide information which is actionable  
34 in specific services.[37] At an individual level, measurement of patient experience could provide  
35 valuable insight into issues with an individual's experience of care and provide real-time feedback to  
36 help identify and resolve unmet needs. The SCPES results suggest that when patients have a  
37 negative experience of care their confidence in the system is shaken and they may feel more  
38 vulnerable when treatment comes to an end. Macmillan's Recovery Package advocates that all  
39 cancer patients should receive a holistic needs assessment and care plan at key points of the cancer  
40 pathway, and a cancer care review completed by primary care within 6 months of the GP being  
41 informed of a patient's cancer diagnosis.[38] If rolled out for all patients, these conversations could  
42 provide an opportunity to assess and monitor patients' experience of care and provide a mechanism  
43 to resolve issues for individual patients as they move through the care pathway. Sensitive, reliable  
44 and service focused tools are needed to measure cancer patient experience in real-time to facilitate  
45 this process.[37,39]

46  
47 The analysis of the free-text comments in the SCPES has highlighted aspects of cancer care which are  
48 particularly important to patients. While many patients have a positive experience of cancer care,  
49 there are some key factors which contribute to negative experiences at all stages of the cancer  
50 pathway. The results of the survey provide important details of the experiences of care which may  
51 matter most to patients, suggesting areas for service improvement which will communicate to  
52  
53  
54  
55  
56  
57  
58  
59  
60



1  
2  
3  
4  
5  
6  
7  
8  
9  
10  
11  
12  
13  
14  
15  
16  
17  
18  
19  
20  
21  
22  
23  
24  
25  
26  
27  
28  
29  
30  
31  
32  
33  
34  
35  
36  
37  
38  
39  
40  
41  
42  
43  
44  
45  
46  
47  
48  
49  
50  
51  
52  
53  
54  
55  
56  
57  
58  
59  
60

patients as individuals, and inspire greater confidence in the system of care. Our analysis also points to particular aspects of care which need attention, including the experience of the lead up to diagnosis, the integration of care, and monitoring patient experience in real-time in order to ensure that we are truly responsive to the needs of people with cancer.

For peer review only

## References

- 1 The Health Foundation. Person-centred care made simple. 2014.  
[www.health.org.uk/sites/health/files/PersonCentredCareMadeSimple.pdf](http://www.health.org.uk/sites/health/files/PersonCentredCareMadeSimple.pdf) (accessed 21 Dec 2016).
- 2 Department of Health. High Quality Care For All: NHS Next Stage Review Final Report. London: The Stationery Office 2008.  
[www.gov.uk/government/uploads/system/uploads/attachment\\_data/file/228836/7432.pdf](http://www.gov.uk/government/uploads/system/uploads/attachment_data/file/228836/7432.pdf) (accessed 21 Dec 2016).
- 3 Doyle C, Lennox L, Bell D. A systematic review of evidence on the links between patient experience and clinical safety and effectiveness. *BMJ Open* 2013;3:e001570.
- 4 NHS England. Cancer News. [www.england.nhs.uk/cancer/2016/10/04/cancer-ratings/](http://www.england.nhs.uk/cancer/2016/10/04/cancer-ratings/) (accessed 21 Dec 2016).
- 5 Luxford K, Sutton S. How does patient experience fit into the overall healthcare picture? *Patient Experience Journal* 2014;1:20-27.
- 6 Ahmad AS, Ormiston-Smith N, Sasieni PD. Trends in the lifetime risk of developing cancer in Great Britain: comparison of risk for those born from 1930 to 1960. *Br J Cancer* 2015;112:943-7.
- 7 Arora NK, Reeve BB, Hays RD, et al. Assessment of quality of cancer-related follow-up care from the cancer survivor's perspective. *J Clin Oncol* 2011;29:1280-9.
- 8 Booij JC, Zegers M, Evers PM, et al. Improving cancer patient care: developments of a generic cancer consumer quality index questionnaire for cancer patients. *BMC Cancer* 2013;13:203.
- 9 Damman OC, Hendriks M, Sixma HJ. Towards more patient centred healthcare: A new consumer quality index instrument to assess patients' experiences with breast care. *Eur J Cancer* 2009;45:1569-77.
- 10 Malin JL, Ko C, Ayanian JZ, et al. Understanding cancer patients' experience and outcomes: Development and pilot study of the Cancer Care Outcomes Research and Surveillance patient survey. *Support Care Cancer* 2006;14:837-48.
- 11 Department of Health. National Cancer Patient Experience Survey Programme – 2010 National Survey Report. Quality Health 2010. [www.quality-health.co.uk/resources/surveys/national-cancer-experience-survey/2010-national-cancer-patient-experience-survey](http://www.quality-health.co.uk/resources/surveys/national-cancer-experience-survey/2010-national-cancer-patient-experience-survey) (accessed 21 Dec 2016)
- 12 Iversen HH, Holmboe O, Bjertnaes OA. The Cancer Patient Experiences Questionnaire (CPEQ): reliability and construct validity following a national survey to assess hospital cancer care from the patient perspective. *BMJ Open* 2012;2:e001437.
- 13 Quality Health. Cancer Patient Experience Survey 2015 All Northern Ireland Report. [www.quality-health.co.uk/resources/surveys/northern-ireland-cancer-patient-experience-survey/2015-northern-ireland-cancer-patient-experience-survey-reports](http://www.quality-health.co.uk/resources/surveys/northern-ireland-cancer-patient-experience-survey/2015-northern-ireland-cancer-patient-experience-survey/northern-ireland-cancer-patient-experience-survey-reports) (accessed 21 Dec 2016).
- 14 Bracher M, Corner DJ, Wagland R. Exploring experiences of cancer care in Wales: a thematic analysis of free-text responses to the 2013 Wales Cancer Patient Experience Survey (WCPES). *BMJ Open* 2016;6:e011830.
- 15 Scottish Government. Scottish Cancer Patient Experience Survey 2015/16.  
<http://www.gov.scot/Publications/2016/06/3957/downloads> (accessed 21 Dec 2016).

- 1  
2  
3 16 Asprey A, Campbell JL, Newbould J, et al. Challenges to the credibility of patient feedback in  
4 primary healthcare settings: a qualitative study. *Br J Gen Pract* 2013;63:e200-8.  
5  
6 17 Riiskjaer E, Ammentorp J, Kofoed PE. The value of open-ended questions in surveys on patient  
7 experience: number of comments and perceived usefulness from a hospital perspective. *Int J Qual*  
8 *Health Care* 2012;24:509-16.  
9  
10 18 Quality Health. National Cancer Patient Experience Survey.  
11 [http://www.ncpes.co.uk/index.php/reports/guidance/2486-2015-national-cancer-patient-](http://www.ncpes.co.uk/index.php/reports/guidance/2486-2015-national-cancer-patient-experience-survey-questionnaire/file)  
12 [experience-survey-questionnaire/file](http://www.ncpes.co.uk/index.php/reports/guidance/2486-2015-national-cancer-patient-experience-survey-questionnaire/file) (accessed 21 Dec 2016).  
13  
14 19 Braun V, Clarke V. Using thematic analysis in psychology. *Qual Res Psychol* 2006;3:77-101.  
15  
16 20 Namey E, Guest G, Thairu L, et al. Data reduction techniques for large qualitative data sets. In  
17 Guest G, MacQueen KM, eds. *Handbook for Team-Based Qualitative Research*. Plymouth, UK:  
18 AltaMira Press 2007:137-161.  
19  
20 21 Scottish Government. Introducing the Scottish Index of Multiple Deprivation 2016.  
21 [www.gov.scot/Resource/0050/00504809.pdf](http://www.gov.scot/Resource/0050/00504809.pdf) (accessed 21 Dec 2016).  
22  
23 22 Bone A, McGrath-Lone L, Day S, Ward H. Inequalities in the care experiences of patients with  
24 cancer: analysis of data from the National Cancer Patient Experience Survey 2011-2012. *BMJ Open*  
25 2014;4:e004567.  
26  
27 23 Williams B. Patient satisfaction: a valid concept? *Soc Sci Med* 1994;38:509-16.  
28  
29 24 Jahagirdar D, Kroll T, Ritchie K, Wyke S. Using patient reported outcome measures in health  
30 services: A qualitative study on including people with low literacy skills and learning disabilities. *BMC*  
31 *Health Services Research* 2012;12:431.  
32  
33 25 Wiseman T, Lucas G, Sangha A, et al. Insights into the experiences of patients with cancer in  
34 London: framework analysis of free-text data from the National Cancer Patient Experience Survey  
35 2012/2013 from the two London Integrated Cancer Systems. *BMJ Open* 2015;5:e007792.  
36  
37 26 Griffiths P, Simon M, Richardson A, et al. Is a larger specialist nurse workforce in cancer care  
38 associated with better patient experience? Cross-sectional study. *J Health Serv Res Policy*  
39 2013;18:39-46.  
40  
41 27 Dossett LA, Hudson JN, Morris AM, et al. the primary care provider (PCP)- cancer specialist  
42 relationship: a systematic review and mixed-methods meta-synthesis. *CA Cancer J Clin* Published  
43 Online First: 11 Oct 2016. doi: 10.3322/caac.21385.  
44  
45 28 Easley J, Miedema B, Carroll JC, et al. Coordination of cancer care between family physicians and  
46 cancer specialists: Importance of communication. *Can Fam Physician* 2016;62:e608-615.  
47  
48 29 Scottish Government. Beating Cancer: Ambition and Action. March 2016.  
49 <http://www.gov.scot/Publications/2016/03/9784/downloads> (accessed 21 Dec 2016).  
50  
51 30 Scottish Executive. Scottish referral guidelines for suspected cancer. February 2007.  
52 [http://www.sehd.scot.nhs.uk/mels/HDL2007\\_09.pdf](http://www.sehd.scot.nhs.uk/mels/HDL2007_09.pdf) (accessed 21 Dec 2016).  
53  
54 31 Healthcare Improvement Scotland. Scottish referral guidelines for suspected cancer. August 2014.  
55 [http://www.healthcareimprovementscotland.org/our\\_work/cancer\\_care\\_improvement/programme](http://www.healthcareimprovementscotland.org/our_work/cancer_care_improvement/programme_resources/scottish_referral_guidelines.aspx)  
56 [resources/scottish\\_referral\\_guidelines.aspx](http://www.healthcareimprovementscotland.org/our_work/cancer_care_improvement/programme_resources/scottish_referral_guidelines.aspx) (accessed 21 Dec 2016).  
57  
58  
59  
60

1  
2  
3 32 Hamilton W, Hajioff S, Graham J, et al. Suspected cancer (part 2 – adults): reference tables from  
4 updated NICE guidance. *BMJ* 2015;350:h3044.  
5

6 33 Scottish Government. Detect Cancer Early. [www.gov.scot/Topics/Health/Services/Cancer/Detect-](http://www.gov.scot/Topics/Health/Services/Cancer/Detect-Cancer-Early)  
7 [Cancer-Early](http://www.gov.scot/Topics/Health/Services/Cancer/Detect-Cancer-Early) (accessed 21 Dec 2016).  
8

9 34 NHS Scotland Quality Improvement Hub. Detect Cancer Early. [www.qihub.scot.nhs.uk/quality-](http://www.qihub.scot.nhs.uk/quality-and-efficiency/cancer/detect-cancer-early.aspx)  
10 [and-efficiency/cancer/detect-cancer-early.aspx](http://www.qihub.scot.nhs.uk/quality-and-efficiency/cancer/detect-cancer-early.aspx) (accessed 21 Dec 2016).  
11

12 35 Parsonage RK, Hiscock J, Law R-J, et al. Patient perspectives on delays in diagnosis and treatment  
13 of cancer: a qualitative analysis of free-text data. *Br J Gen Pract* Published Online First: 21 Nov 2016.  
14 doi: [10.3399/bjgp16X688357](https://doi.org/10.3399/bjgp16X688357).  
15

16 36 Foglino S, Bravi F, Carretta E, et al. The relationship between integrated care and cancer patient  
17 experience: a scoping review of the evidence. *Health Policy* 2016;120:55-63.  
18

19 37 Manary MP, Boulding W, Staelin R, et al. The patient experience and health outcomes. *N Engl J*  
20 *Med* 2013;368:201-3.  
21

22 38 Macmillan Cancer Support. The Recovery Package: sharing good practice. 2015  
23 [www.macmillan.org.uk/ images/recovery-package-sharing-good-practice\\_tcm9-299778.pdf](http://www.macmillan.org.uk/images/recovery-package-sharing-good-practice_tcm9-299778.pdf)  
24 (accessed 21 Dec 2016).  
25

26 39 Saunders C, Carter D, Jordan A, et al. Cancer patient experience measures – an evidence review. *J*  
27 *Psychosoc Oncol* 2016;34:200-22.  
28  
29  
30  
31  
32  
33  
34  
35  
36  
37  
38  
39  
40  
41  
42  
43  
44  
45  
46  
47  
48  
49  
50  
51  
52  
53  
54  
55  
56  
57  
58  
59  
60

Table 1 Comment boxes

|               | Question Topic: Is there anything else you would like to tell us about...       | Preceding Questionnaire Section Headings                                            |
|---------------|---------------------------------------------------------------------------------|-------------------------------------------------------------------------------------|
| Comment Box 1 | The lead-up to your cancer diagnosis, or the way you found out you had cancer   | Seeing your GP,<br>Diagnostic Tests,<br>Finding out what was wrong with you         |
| Comment Box 2 | The way decisions were made about your treatment                                | Deciding the best treatment for you                                                 |
| Comment Box 3 | The support you received (including from a clinical nurse specialist)           | Clinical Nurse Specialist,<br>Support for people with cancer                        |
| Comment Box 4 | The care you received when you had an operation or stayed overnight in hospital | Operations,<br>Hospital care as an inpatient                                        |
| Comment Box 5 | The day patient/outpatient care you received                                    | Hospital care as a day patient/outpatient                                           |
| Comment Box 6 | Your chemotherapy/radiotherapy treatment                                        | Radiotherapy and chemotherapy                                                       |
| Comment Box 7 | Your experiences of cancer care                                                 | Home care and support,<br>Care from your General Practice,<br>Your overall NHS Care |

Table 2 Demographic details of all respondents and those that left at least one comment

| Respondent characteristics              | Left at least one comment |            | Respondents who left no comment |            |
|-----------------------------------------|---------------------------|------------|---------------------------------|------------|
|                                         | Number of respondents     | Percentage | Number of respondents           | Percentage |
| <b>Age</b>                              |                           |            |                                 |            |
| 16-34                                   | 47                        | 2          | 38                              | 2          |
| 35-44                                   | 130                       | 5          | 52                              | 3          |
| 45-54                                   | 369                       | 14         | 241                             | 12         |
| 55-64                                   | 649                       | 25         | 487                             | 24         |
| 65-74                                   | 864                       | 34         | 766                             | 37         |
| Age 75+                                 | 512                       | 20         | 486                             | 23         |
|                                         | $\chi^2(5)=37.3, p<0.001$ |            |                                 |            |
| <b>Gender</b>                           |                           |            |                                 |            |
| Female                                  | 1,520                     | 59         | 1,139                           | 54         |
| Male                                    | 1,072                     | 41         | 973                             | 46         |
|                                         | $\chi^2(1)=10.5, p=0.001$ |            |                                 |            |
| <b>Sexual Orientation</b>               |                           |            |                                 |            |
| Heterosexual                            | 2,517                     | 99         | 2,028                           | 99         |
| Bisexual, Gay or Lesbian, or Other      | 27                        | 1          | 20                              | 1          |
|                                         | No significant difference |            |                                 |            |
| <b>Ethnic Origin</b>                    |                           |            |                                 |            |
| White                                   | 2,558                     | 99         | 2,077                           | 98         |
| All other ethnic origins                | 29                        | 1          | 33                              | 2          |
|                                         | No significant difference |            |                                 |            |
| <b>Employment status</b>                |                           |            |                                 |            |
| Don't work due to illness or disability | 227                       | 9          | 156                             | 7          |
| Other                                   | 42                        | 2          | 47                              | 2          |
| Retired                                 | 1,568                     | 60         | 1,363                           | 64         |
| Unemployed/looking for work             | 21                        | 1          | 22                              | 1          |
| Work full time/In full time education   | 458                       | 18         | 347                             | 14         |
| Work part time                          | 289                       | 11         | 192                             | 9          |
|                                         | $\chi^2(5)=14.5, p=0.013$ |            |                                 |            |
| <b>SIMD quintile (2012)</b>             |                           |            |                                 |            |
| (most deprived) 1                       | 327                       | 13         | 381                             | 19         |
| 2                                       | 453                       | 18         | 351                             | 18         |
| 3                                       | 530                       | 21         | 381                             | 19         |
| 4                                       | 572                       | 23         | 432                             | 22         |
| (least deprived) 5                      | 644                       | 25         | 435                             | 22         |
|                                         | $\chi^2(4)=35.8, p<0.001$ |            |                                 |            |
| <b>Tumour group</b>                     |                           |            |                                 |            |
| Brain/Central Nervous System            | 21                        | 1          | 18                              | 1          |
| Breast                                  | 659                       | 25         | 528                             | 24         |
| Colorectal/Lower                        | 427                       | 16         | 294                             | 14         |

|                               |                                |    |     |    |
|-------------------------------|--------------------------------|----|-----|----|
| gastrointestinal              |                                |    |     |    |
| Gynaecological                | 213                            | 8  | 146 | 7  |
| Haematological                | 215                            | 8  | 164 | 8  |
| Head and Neck                 | 148                            | 6  | 116 | 5  |
| Lung                          | 163                            | 6  | 129 | 6  |
| Prostate                      | 290                            | 11 | 302 | 14 |
| Sarcoma                       | 20                             | 1  | 14  | 1  |
| Skin                          | 70                             | 3  | 59  | 3  |
| Upper Gastrointestinal        | 118                            | 4  | 71  | 3  |
| Urological                    | 173                            | 6  | 135 | 6  |
| Other/Tumour Group<br>Unknown | 146                            | 5  | 196 | 9  |
|                               | $\chi^2(12)=42.9, p\leq 0.001$ |    |     |    |

Table 3 First order code by comment box

| Comment Box | Positive | Negative | Factual/neutral | Irrelevant/miscellaneous | Both positive and negative | Total |
|-------------|----------|----------|-----------------|--------------------------|----------------------------|-------|
| 1           | 369      | 571      | 597             | 22                       | 114                        | 1673  |
| 2           | 338      | 260      | 242             | 12                       | 39                         | 891   |
| 3           | 499      | 232      | 76              | 8                        | 83                         | 898   |
| 4           | 478      | 293      | 88              | 144                      | 117                        | 1120  |
| 5           | 292      | 153      | 46              | 143                      | 44                         | 678   |
| 6           | 197      | 105      | 65              | 211                      | 48                         | 626   |
| 7           | 355      | 355      | 94              | 45                       | 226                        | 1075  |
| Total       | 2528     | 1969     | 1208            | 585                      | 671                        | 6961  |



Table 4 Summary of the positive themes

| Themes                               | Number of comments | Quotes                                                                                                                                                                                                                                                                                                                                                                                                                                           |
|--------------------------------------|--------------------|--------------------------------------------------------------------------------------------------------------------------------------------------------------------------------------------------------------------------------------------------------------------------------------------------------------------------------------------------------------------------------------------------------------------------------------------------|
| <b>Generally positive experience</b> | 1995               | All in all very good.<br><i>Female, 66-75, Breast Cancer</i>                                                                                                                                                                                                                                                                                                                                                                                     |
| <b>Good support</b>                  | 738                | Clinical nurse was extremely helpful and gave me great friendship and support during this horrendous time. I great font of knowledge with financial help, the benefits I could apply for. She assisted in the filling out of complicated forms. A real treasure.<br><i>Female, 66-75, Haematological Cancer</i>                                                                                                                                  |
| <b>Information</b>                   | 508                | I had/have an excellent consultant surgeon by the name of Mr [name removed]. I have had the best of care and attention from him. Despite being an extremely busy man, he always has time to spend with me and my wife at appointments. He explains everything very clearly and answers our questions thoroughly. In my opinion I couldn't ask for a better man to care for me.<br><i>Male, 66-75, Colorectal / Lower Gastrointestinal Cancer</i> |
| <b>Good clinical care</b>            | 362                | Despite complications and infections arising from my prostate removal the care and attention that I received from [name removed] and his team of doctors and nurses was of the highest order. I could have no complaints. Very impressive urology care team.<br><i>Male, 66-75, Prostate Cancer</i>                                                                                                                                              |
| <b>Efficient processes</b>           | 279                | I was admitted to the [hospital name removed] after presenting to my GP with [condition removed]. Had ultrasound, MRI and CT scan all within five days and due to tumour was transferred to the [hospital name removed], scoped and biopsy taken and I had my full diagnosis within three weeks and chemotherapy started within five weeks.<br><i>Male, 51-65, Upper Gastrointestinal Cancer</i>                                                 |
| <b>Trust in the system</b>           | 81                 | Discussions were business-like. Facts were presented to me, questions answered and information was very clear and decisions agreed. It was a very democratic, and respectfully conducted process.<br><i>Male, 66-75, Upper Gastrointestinal Cancer</i>                                                                                                                                                                                           |

Table 5 Summary of the negative themes and sub-themes

| Themes                                                   | Sub Themes                                | Number of comments | Quotes                                                                                                                                                                                                                                                                                                                                                                                                                                                                                                                                                                                                                                                                                                                                                                                             |
|----------------------------------------------------------|-------------------------------------------|--------------------|----------------------------------------------------------------------------------------------------------------------------------------------------------------------------------------------------------------------------------------------------------------------------------------------------------------------------------------------------------------------------------------------------------------------------------------------------------------------------------------------------------------------------------------------------------------------------------------------------------------------------------------------------------------------------------------------------------------------------------------------------------------------------------------------------|
| <b>Not feeling confident or secure within the system</b> | Poor care                                 | 372                | Post-op I could hear the recovery nurses talking about my pain relief. I was in agony and they did not believe me as I had had a lot of analgesia. I left recovery in agony. Eventually I got oramorph on the ward and that took it away. I felt the ward staff inexperienced in dealing with the issues of cancer and very few made eye contact when I asked questions about it.<br><i>Female, 36-50, Breast Cancer</i>                                                                                                                                                                                                                                                                                                                                                                           |
|                                                          | Inadequate aftercare                      | 262                | When I was discharged from ward, I could have been going home with a finger bandage. No instructions as to care or further help was given.<br><i>Female, 51-65, Urological Cancer</i>                                                                                                                                                                                                                                                                                                                                                                                                                                                                                                                                                                                                              |
|                                                          | Difficulty getting into the system        | 200                | Looking back I have concerns about my GP Practice. They took far too long and it took far too many visits for me to be referred for a scan. I had testicular cancer. The issue seemed to be a view that there was no need to physically examine the testicle. It seems when it was examined, the need for an immediate referral was very obvious. Had I been clinically examined earlier, I would have been referred for a scan much earlier. The doctor who eventually did refer me to radiology made a very odd passing comment. I complained about pain. After the examination this doctor said that I didn't seem to react much if the area was tender and painful. It's odd that I was questioned for trying be stoic and not engage in histrionics.<br><i>Male, 36-50, Urological Cancer</i> |
|                                                          | Inconsistent or inappropriate information | 158                | I received conflicting and confusing information from [number removed] different doctors and there was no support and I felt each doctor just wanted me out as quickly as possible.<br><i>Female, 51-65, Tumour Group not recorded</i>                                                                                                                                                                                                                                                                                                                                                                                                                                                                                                                                                             |
|                                                          | Lack of faith in the system               | 158                | You're just left between appointments with no follow up scans or nothing. Unless you have had cancer, people don't understand how important it is.<br><i>Female, 51-65, Breast Cancer</i>                                                                                                                                                                                                                                                                                                                                                                                                                                                                                                                                                                                                          |
|                                                          | Inadequate contact                        | 50                 | Very little contact with oncology doctor during or after treatment.<br><i>Male, 76 and over, Prostate Cancer</i>                                                                                                                                                                                                                                                                                                                                                                                                                                                                                                                                                                                                                                                                                   |
|                                                          | <b>Total</b>                              |                    | <b>1200</b>                                                                                                                                                                                                                                                                                                                                                                                                                                                                                                                                                                                                                                                                                                                                                                                        |
| <b>Not feeling that individual</b>                       | Lack of Information                       | 407                | The effects of radiotherapy and chemo however should have been more emphasised. I thought I was going to die after treatment, I suffered horrendous pain all over.                                                                                                                                                                                                                                                                                                                                                                                                                                                                                                                                                                                                                                 |

|                       |                                           |             |                                                                                                                                                                                                                                                                                                                                                                                                          |
|-----------------------|-------------------------------------------|-------------|----------------------------------------------------------------------------------------------------------------------------------------------------------------------------------------------------------------------------------------------------------------------------------------------------------------------------------------------------------------------------------------------------------|
| <b>needs were met</b> |                                           |             | <i>Male, 51-65, Head and Neck Cancer</i>                                                                                                                                                                                                                                                                                                                                                                 |
|                       | Poor communication                        | 345         | Most of the staff were approachable. The consultant was offhand and dismissive, especially when explaining the side effects - discussion with fellow patients revealed that this was a common issue. The consultant did not fully explain procedures nor attempt to follow up. The impression given was that they were busy and only had a short time to consult.<br><i>Female, 51-65, Breast Cancer</i> |
|                       | Poor Emotional Support and Responsiveness | 270         | It's so important for nurses to be able to offer emotional support. I feel that the nurses were always so busy and quite distant at <name removed>. Often conversations about my care at bedside but didn't look at me/involve me.<br><i>Female, 51-65, Colorectal/Lower Gastrointestinal Cancer</i>                                                                                                     |
|                       | Involvement and choice                    | 97          | Having said I wanted to know everything I thought I would be treated by doctors as a partner in my care. Instead I felt like a passive battleground with the doctors on one side and the disease on the other.<br><i>Female, 51-65, Haematological Cancer</i>                                                                                                                                            |
|                       | Specific and unusual circumstances        | 34          | I had to convince my GP for the test when my [family members removed] died from it. They felt I was too young at [age removed] to be tested, despite being a family history of prostate cancer.<br><i>Male, 51-65, Prostate Cancer</i>                                                                                                                                                                   |
|                       | Family                                    | 21          | Although my treatment in hospital was excellent and I was kept very well informed, my family found it very difficult to find anyone to give them information about me.<br><i>Male, 76 and over, Urological Cancer</i>                                                                                                                                                                                    |
|                       | <b>Total</b>                              | <b>1174</b> |                                                                                                                                                                                                                                                                                                                                                                                                          |
| <b>Structures</b>     | Unsuitable or uncomfortable environment   | 145         | I found the care in unit [name removed] very good, I found the general ward to be chaotic, too busy, very poorly maintained physical environment, very poor toilet facilities, real dignity issues for colorectal patients.<br><i>Female, 36-50, Colorectal/Lower Gastrointestinal Cancer</i>                                                                                                            |
|                       | Staffing Levels                           | 143         | During the day the ward was well staffed with qualified cancer nurses, although they were under severe pressure at times. At night, staffing was inadequate to cope with the demands of very ill patients and at times treatment and medication were badly delayed due to emergencies.<br><i>Female, 66-75, Haematological Cancer</i>                                                                    |
|                       | Privacy                                   | 67          | When doctors attend your bed to tell you vital and personal and private information, closing the curtain around you is not enough privacy.<br><i>Male, 51-65, Upper Gastrointestinal Cancer</i>                                                                                                                                                                                                          |
|                       | Transport                                 | 49          | The only thing was chemotherapy treatment. I had                                                                                                                                                                                                                                                                                                                                                         |

|                  |                                                               |             |                                                                                                                                                                                                                                                                                                                                                                                                                                                                                                      |
|------------------|---------------------------------------------------------------|-------------|------------------------------------------------------------------------------------------------------------------------------------------------------------------------------------------------------------------------------------------------------------------------------------------------------------------------------------------------------------------------------------------------------------------------------------------------------------------------------------------------------|
|                  |                                                               |             | to be at the hospital by 8pm each week and to get there I had to arrange a taxi and was told this would be repaid to me if I kept the receipts. When I claimed I was told this was no longer the case.<br><i>Male, 51-65, Lung Cancer</i>                                                                                                                                                                                                                                                            |
|                  | <b>Total</b>                                                  | <b>404</b>  |                                                                                                                                                                                                                                                                                                                                                                                                                                                                                                      |
| <b>Processes</b> | Waits and delays                                              | 454         | My original operation was cancelled several times at (after pre-op procedures) and delayed. Operation was much more extensive as a result of delays and eventually carried out almost 5 months after discovery of cancer.<br><i>Male, 66-75, Colorectal / Lower Gastrointestinal Cancer</i>                                                                                                                                                                                                          |
|                  | Ineffective and unreliable processes (organisational systems) | 289         | The return of my cancer was picked up at a routine scan and I was told I would likely need further surgery. It is now six months later and I still have not had it and have no further date. This has mainly been caused by a delay in communication between local and city hospital and by different departments within same hospital failing to communicate with each other. Again during all this time no one has discussed or confirmed it is cancer.<br><i>Female, 36-50, Urological Cancer</i> |
|                  | Fragmented care                                               | 276         | Diagnosis, treatment and surgery was done over four separate hospitals and venues. Due to this, information was sometimes missed out or assumed given by someone else. Due to this situation it was difficult for me to know who to contact when I needed advice.<br><i>Female, 51-65, Breast Cancer</i>                                                                                                                                                                                             |
|                  | <b>Total</b>                                                  | <b>1019</b> |                                                                                                                                                                                                                                                                                                                                                                                                                                                                                                      |

Table 6 Proportion of positive comments by Comments Box 1-5

|                                         | <b>Lead-up to diagnosis<br/>(Box 1)</b> | <b>The way decisions were made about treatment<br/>(Box 2)</b> | <b>The support you received<br/>(Box 3)</b> | <b>Inpatient care<br/>(Box 4)</b> | <b>Day or outpatient care<br/>(Box 5)</b> |
|-----------------------------------------|-----------------------------------------|----------------------------------------------------------------|---------------------------------------------|-----------------------------------|-------------------------------------------|
|                                         | <b>Positive<br/>N (%)</b>               | <b>Positive<br/>N (%)</b>                                      | <b>Positive<br/>N (%)</b>                   | <b>Positive<br/>N(%)</b>          | <b>Positive<br/>N (%)</b>                 |
| <b>Age</b>                              |                                         |                                                                |                                             |                                   |                                           |
| 16-35                                   | 6 (22.2)                                | 4 (26.7)                                                       | 9 (60.0)                                    | 8 (47.1)                          | 2 (25.0)                                  |
| 36-50                                   | 41 (29.5)                               | 40 (50.0)                                                      | 60 (60.0)                                   | 50 (53.2)                         | 30 (46.9)                                 |
| 51-65                                   | 118 (32.6)                              | 115 (48.1)                                                     | 178 (62.5)                                  | 165 (55.6)                        | 109 (61.9)                                |
| 66-75                                   | 133 (46.0)                              | 115 (67.6)                                                     | 173 (75.9)                                  | 174 (70.2)                        | 98 (76.6)                                 |
| 76 and over                             | 60 (60.6)                               | 55 (71.4)                                                      | 63 (75.9)                                   | 73 (74.5)                         | 49 (75.4)                                 |
|                                         | $\chi^2(4)=40^{**}$                     | $\chi^2(4)=29^{**}$                                            | $\chi^2(4)=16.3^{**}$                       | $\chi^2(4)=23.5^{**}$             | $\chi^2(4)=26.3^{**}$                     |
| <b>Employment Status</b>                |                                         |                                                                |                                             |                                   |                                           |
| Work full time/In full time education   | 51 (26.3)                               | 62 (53.4)                                                      | 76 (58.5)                                   | 74 (51.7)                         | 44 (50.0)                                 |
| Work part time                          | 53 (40.5)                               | 41 (55.4)                                                      | 66 (67.3)                                   | 53 (55.8)                         | 37 (60.7)                                 |
| Unemployed/looking for work             | 4 (44.4)                                | 1 (12.5)                                                       | 1 (14.3)                                    | 1 (25.0)                          | 1 (33.3)                                  |
| Retired                                 | 224 (46.8)                              | 198 (63.3)                                                     | 289 (75.1)                                  | 297 (69.1)                        | 173 (75.5)                                |
| Don't work due to illness or disability | 21 (23.3)                               | 25 (41.0)                                                      | 48 (59.3)                                   | 42 (51.9)                         | 23 (50.0)                                 |
|                                         | $\chi^2(4)=34.8^{**}$                   | $\chi^2(4)=18.5^{**}$                                          | $\chi^2(4)=26.6^{**}$                       | $\chi^2(4)=22.9^{**}$             | $\chi^2(4)=26.3^{**}$                     |
| <b>Tumour Group</b>                     |                                         |                                                                |                                             |                                   |                                           |
| Lung                                    | 24 (46.2)                               | 20 (64.5)                                                      | 31 (83.8)                                   | 40 (85.1)                         | 15 (88.2)                                 |
| Prostate                                | 41 (48.8)                               | 42 (55.3)                                                      | 61 (83.6)                                   | 37 (58.7)                         | 30 (73.2)                                 |
| Upper Gastrointestinal                  | 16 (40.0)                               | 23 (76.7)                                                      | 21 (63.6)                                   | 22 (68.8)                         | 5 (50.0)                                  |

|                                   |                     |                      |                      |                     |                        |
|-----------------------------------|---------------------|----------------------|----------------------|---------------------|------------------------|
| Colorectal/Lower Gastrointestinal | 70 (46.1)           | 61 (69.3)            | 90 (75.0)            | 91 (62.8)           | 35 (63.6)              |
| Breast                            | 100 (41.7)          | 74 (46.8)            | 112 (55.7)           | 111 (55.0)          | 65 (54.6)              |
| Haematological                    | 22 (29.7)           | 24 (70.6)            | 40 (72.7)            | 31 (75.6)           | 46 (82.1)              |
| Head and Neck                     | 17 (29.8)           | 25 (56.8)            | 36 (83.7)            | 31 (66.0)           | 12 (52.2)              |
| Gynaecological                    | 28 (31.8)           | 24 (58.5)            | 39 (68.4)            | 47 (61.0)           | 34 (79.1)              |
| Brain/CNS/<br>Sarcoma             | 7 (33.3)            | 8 (66.7)             | 11 (68.8)            | 8 (50.0)            | 6 (66.7)               |
| Skin                              | 11 (36.7)           | 6 (40.0)             | 11 (91.7)            | 9 (64.3)            | 11 (61.1)              |
| Urological                        | 16 (27.6)           | 19 (47.5)            | 25 (58.1)            | 34 (60.7)           | 18 (62.1)              |
|                                   | $\chi^2(10)=18.5^*$ | $\chi^2(10)=24^{**}$ | $\chi^2(10)=40^{**}$ | $\chi^2(10)=20.5^*$ | $\chi^2(10)=24.9^{**}$ |

\*p<0.05, \*\*p<0.01

1  
2  
3  
4  
5  
6  
7  
8  
9  
10  
11  
12  
13  
14  
15  
16  
17  
18  
19  
20  
21  
22  
23  
24  
25  
26  
27  
28  
29  
30  
31  
32  
33  
34  
35  
36  
37  
38  
39  
40  
41  
42  
43  
44  
45  
46  
47  
48  
49  
50  
51  
52  
53  
54  
55  
56  
57  
58  
59  
60

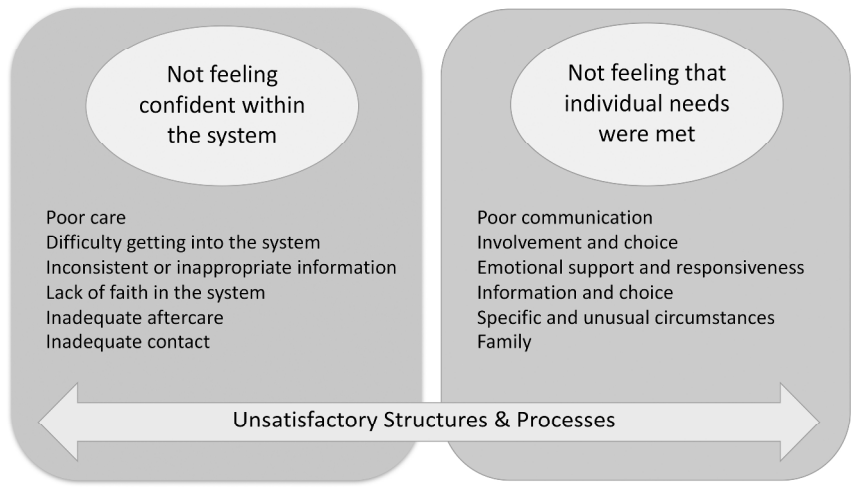

Figure 1 - Negative Aspects of Care

338x190mm (300 x 300 DPI)

review only
